# Supplementary material for: Comparative proteomics analysis of Spodoptera frugiperda cells during Autographa californica multiple nucleopolyhedrovirus infection
Source: Springer Nature journal article supplement (doi:10.1186/s12985-015-0346-9), 2015-08-03
Supplement: MOESM1 [file 9770280]

| Accession | Description                                               | Proteins | Unique Peptides | MW [kDa] | calc. pI | ANOVA p value |
|-----------|-----------------------------------------------------------|----------|-----------------|----------|----------|---------------|
| K9J9U2    | Actin depolymerization factor                             | 4        | 3               | 16.9     | 7.2      | 6.36E-06      |
| Q8WQJ2    | 60S acidic ribosomal protein P0                           | 10       | 4               | 33.9     | 6.81     | 0.000193      |
| H9IZ19    | Uncharacterized protein                                   | 1        | 1               | 21.8     | 7.02     | 0.001081      |
| E9NZS5    | Arginine kinase                                           | 245      | 5               | 39.8     | 6.02     | 0.000276      |
| E5CWM8    | Elongation factor 1-alpha (Fragment)                      | 1066     | 1               | 42.7     | 8.41     | 0.000245      |
| F8TJD5    | Elongation factor 1-alpha (Fragment)                      | 939      | 1               | 42.7     | 8.24     | 0.001212      |
| S4PMT5    | Barrier-to-autointegration factor                         | 2        | 2               | 10.1     | 5.48     | 0.0039        |
| B3TEH3    | Putative enolase protein (Fragment)                       | 616      | 2               | 40.7     | 5.6      | 0.00035       |
| G6DKM8    | Mago nashi                                                | 2        | 1               | 17.2     | 6.52     | 0.000545      |
| H2EVJ3    | Elongation factor 1 alpha (Fragment)                      | 8        | 2               | 16.1     | 6.67     | 0.00208       |
| Q6F467    | Ribosomal protein S17                                     | 6        | 1               | 15.3     | 9.7      | 0.001105      |
| E3UJZ8    | Calmodulin                                                | 5        | 9               | 16.8     | 4.22     | 3.10E-05      |
| S4PXW2    | Lamin C                                                   | 1        | 2               | 70.2     | 6.89     | 0.023153      |
| C7SZ24    | Elongation factor 1-alpha (Fragment)                      | 329      | 1               | 38.6     | 8.05     | 0.006246      |
| E2EI06    | Isocitrate dehydrogenase (Fragment)                       | 1040     | 1               | 26.9     | 7.47     | 0.000258      |
| Q86CZ0    | ADP/ATP translocase                                       | 3        | 3               | 32.8     | 9.83     | 0.00026       |
| B9U7K0    | Elongation factor-1 alpha (Fragment)                      | 19       | 2               | 29.1     | 8.22     | 0.000956      |
| D1LYK5    | Ribosomal protein L12                                     | 4        | 1               | 17.5     | 9.63     | 0.0001        |
| I4DKA8    | Tankyrase                                                 | 3        | 1               | 12.7     | 5.27     | 0.002511      |
| B7SET3    | Elongation factor 1-alpha (Fragment)                      | 751      | 1               | 45.1     | 8.34     | 4.71E-05      |
| G3K8T0    | Heat shock protein (Fragment)                             | 107      | 1               | 37.4     | 5.15     | 0.001134      |
| Q3V6C6    | Heat shock protein 90                                     | 63       | 1               | 82.4     | 5.07     | 0.038981      |
| Q8I6Y8    | EIF2 alpha subunit                                        | 6        | 11              | 37       | 4.97     | 9.46E-06      |
| H9IX91    | Uncharacterized protein                                   | 1        | 1               | 41.7     | 6.74     | 0.021005      |
| Q5UAT9    | 60S acidic ribosomal protein P2                           | 4        | 1               | 11.5     | 4.74     | 0.044428      |
| H9CV61    | Elongation factor 1-alpha (Fragment)                      | 766      | 1               | 45       | 8.24     | 0.013316      |
| E3UPC7    | Ribosomal protein L30                                     | 6        | 4               | 12.4     | 9.66     | 0.010668      |
| Q1HPW4    | Eukaryotic translation initiation factor 3 subunit I      | 2        | 2               | 36.9     | 6.11     | 0.00012       |
| E3UUW3    | Ribosomal protein L37                                     | 8        | 4               | 10.6     | 11.78    | 9.27E-06      |
| A7UFP8    | Elongation factor 1-alpha (Fragment)                      | 755      | 1               | 44.7     | 8.48     | 0.012829      |
| S4NRF9    | 40S ribosomal protein S15 (Fragment)                      | 7        | 4               | 14.9     | 10.18    | 7.07E-05      |
| E2EFQ3    | Elongation factor 1 alpha (Fragment)                      | 143      | 1               | 16.1     | 8.57     | 9.57E-05      |
| Q8MYA5    | Proliferating cell nuclear antigen                        | 7        | 6               | 29       | 4.78     | 0.001033      |
| Q1HPV7    | Histone H2A                                               | 4        | 3               | 13.4     | 10.55    | 4.61E-08      |
| S4NN37    | Bicaudal (Fragment)                                       | 4        | 2               | 18.9     | 7.47     | 0.003817      |
| A9XZA5    | Putative pre-mRNA splicing factor RNA helicase (Fragment) | 3        | 2               | 21.3     | 8.43     | 0.018548      |
| E1U7I5    | UDP-glucose pyrophosphorylase                             | 3        | 2               | 57       | 7.88     | 0.000582      |
| S4PGL2    | Phosphopantothencysteine                                  | 2        | 1               | 8.1      | 5.29     | 0.000151      |

|        |                                                      |    |   |      |       |          |
|--------|------------------------------------------------------|----|---|------|-------|----------|
|        | synthetase (Fragment)                                |    |   |      |       |          |
| L7QLT0 | Triosephosphate isomerase (Fragment)                 | 91 | 1 | 16.2 | 5.33  | 0.008279 |
| G6CMA9 | Poly A binding protein                               | 4  | 1 | 67.2 | 9.47  | 2.17E-05 |
| S4PCX5 | Ribonucleoside-diphosphate reductase small chain     | 2  | 1 | 43.6 | 5.44  | 5.87E-05 |
| H9JMC0 | Uncharacterized protein                              | 1  | 1 | 42.4 | 8.05  | 0.000492 |
| S4PS66 | Tcp-1eta (Fragment)                                  | 2  | 2 | 35.8 | 7.43  | 1.06E-06 |
| G6DQ61 | Chaperonin                                           | 2  | 1 | 58.9 | 7.06  | 2.70E-05 |
| G6CKL7 | V-type proton ATPase subunit E                       | 9  | 6 | 26   | 8.48  | 0.000196 |
| I4DP84 | Citrate synthase (Fragment)                          | 1  | 1 | 32   | 6.52  | 1.69E-06 |
| H9IT95 | Uncharacterized protein                              | 3  | 3 | 45.8 | 4.65  | 0.002483 |
| H9J1E8 | Proteasome subunit beta type                         | 1  | 1 | 24.1 | 5.62  | 4.82E-05 |
| I4DJK3 | Protein kinase C inhibitor                           | 2  | 1 | 13.9 | 6.8   | 0.005779 |
| I4DJ87 | ATP synthase delta chain, mitochondrial              | 3  | 3 | 17.1 | 6.58  | 5.11E-06 |
| H9JCM2 | Uncharacterized protein                              | 2  | 2 | 51.7 | 6.57  | 0.025633 |
| G6DNL4 | Uncharacterized protein                              | 2  | 1 | 55.9 | 6.02  | 0.016618 |
| G6DH09 | Mitochondrial carrier-like protein                   | 1  | 3 | 33.1 | 8.95  | 0.012484 |
| G0T406 | Alcohol dehydrogenase                                | 11 | 3 | 40   | 6.89  | 0.000138 |
| L7R6U6 | Putative enolase protein (Fragment)                  | 26 | 1 | 40.6 | 6.04  | 0.022211 |
| Q308N8 | Glutathione S-transferase                            | 4  | 2 | 24.5 | 8.63  | 0.002324 |
| I4DMH6 | Calreticulin                                         | 2  | 2 | 45.9 | 4.61  | 0.001566 |
| E3UKL7 | Myosin heavy chain (Fragment)                        | 1  | 2 | 41.7 | 8.41  | 0.00116  |
| Q5I7M6 | Lark-PA                                              | 4  | 1 | 38.5 | 9.22  | 0.004344 |
| H9JEB5 | Uncharacterized protein                              | 3  | 1 | 18.9 | 5.08  | 0.011133 |
| E7DZ32 | Ribosomal protein L36A                               | 6  | 3 | 12.3 | 10.61 | 1.06E-05 |
| I4DK67 | Boca protein                                         | 4  | 3 | 21.6 | 4.89  | 0.003669 |
| S4P2L5 | Uncharacterized protein (Fragment)                   | 3  | 1 | 7.8  | 10.13 | 0.001248 |
| H9JV88 | Uncharacterized protein                              | 4  | 2 | 9.3  | 9.55  | 0.003566 |
| C9S271 | Putative enoyl-CoA hydratase                         | 3  | 2 | 32   | 8.09  | 2.29E-05 |
| M9UVR1 | Voltage-dependent anion-selective channel            | 1  | 1 | 30.3 | 8.05  | 0.017154 |
| D6BNT9 | Glucose-6-phosphate isomerase                        | 19 | 3 | 61.6 | 7.01  | 0.012198 |
| H9J814 | Uncharacterized protein                              | 1  | 1 | 32.9 | 9.26  | 0.000356 |
| D2SNQ8 | Aldehyde dehydroxygenase (Fragment)                  | 3  | 2 | 19.6 | 6.19  | 0.020096 |
| B6VAH6 | Proteasome subunit beta type                         | 4  | 1 | 30.9 | 7.01  | 0.000205 |
| G6DAS4 | ATP synthase subunit epsilon, mitochondrial          | 1  | 1 | 10.4 | 10.39 | 0.000598 |
| S4PCA3 | Threonyl-tRNA synthetase                             | 1  | 1 | 65.4 | 7.23  | 0.000172 |
| I1E4Y7 | Eukaryotic translation initiation factor 3 subunit G | 3  | 2 | 30.3 | 8.34  | 3.98E-05 |

|        |                                                                   |     |   |       |       |          |
|--------|-------------------------------------------------------------------|-----|---|-------|-------|----------|
| I4DIQ3 | Protein disulfide-isomerase                                       | 5   | 2 | 55.3  | 4.74  | 0.002171 |
| B2X122 | Serpin-2                                                          | 8   | 7 | 41.1  | 4.84  | 4.48E-05 |
| Q95UN1 | 28S ribosomal protein S6                                          | 2   | 3 | 17.5  | 9.09  | 0.004214 |
| S4PBN1 | JmjC domain-containing histone demethylation protein 1 (Fragment) | 3   | 1 | 8     | 10.17 | 0.000213 |
| H9JA60 | Uncharacterized protein                                           | 2   | 2 | 38.6  | 8.85  | 3.28E-05 |
| G6CKB9 | Uncharacterized protein                                           | 1   | 1 | 6.6   | 8.57  | 6.37E-05 |
| E9KGW9 | Glu-+ pro-tRNA synthetase (Fragment)                              | 74  | 1 | 14.6  | 5.26  | 0.003585 |
| Q1HPY3 | Secreted protein acidic and rich in cysteine                      | 5   | 4 | 37.4  | 4.97  | 0.000778 |
| U5KC00 | Aldo-keto reductase                                               | 7   | 2 | 35.8  | 6.8   | 0.000426 |
| G6DME4 | Acidic ribosomal protein                                          | 1   | 1 | 11.4  | 4.21  | 0.014593 |
| E0D4V7 | Phenylalanyl-tRNA synthetase beta subunit                         | 1   | 2 | 65.2  | 6.49  | 0.005591 |
| S4NQY4 | N-acetyltransferase                                               | 4   | 2 | 13.7  | 6.79  | 0.009335 |
| G6CIZ7 | Triosephosphate isomerase                                         | 114 | 1 | 26.7  | 7.34  | 0.003249 |
| D1LYQ1 | Ribosomal protein L29                                             | 6   | 1 | 8.4   | 11.82 | 0.025087 |
| I4DIL8 | Elongation factor 1 gamma                                         | 2   | 4 | 48.4  | 6.05  | 0.005662 |
| H9IX66 | Uncharacterized protein                                           | 1   | 1 | 80.8  | 7.2   | 0.00076  |
| C5I0W6 | Annexin                                                           | 2   | 2 | 36.3  | 5.78  | 0.016064 |
| G6DIQ9 | Tudor micrococcal nuclease                                        | 2   | 4 | 100.3 | 8.31  | 0.005069 |
| I4DNK8 | Courtless                                                         | 2   | 1 | 18.7  | 4.96  | 0.021802 |
| I4DNY2 | Clathrin coat associated protein ap-50                            | 1   | 1 | 33.2  | 9.07  | 0.000596 |
| G6CTH9 | ER lumen protein retaining receptor                               | 5   | 2 | 24.5  | 8.82  | 0.045324 |
| G6CTA2 | Serine hydroxymethyltransferase                                   | 1   | 1 | 51.4  | 7.47  | 0.000634 |
| H9IV80 | Uncharacterized protein                                           | 1   | 2 | 78.9  | 6.77  | 0.001307 |
| S4P8J8 | Geminin                                                           | 2   | 2 | 19.4  | 4.65  | 0.0018   |
| S4NQB0 | Putative arginyl-tRNA synthetase (Fragment)                       | 1   | 1 | 8.7   | 4.86  | 0.000126 |
| H9JD02 | Uncharacterized protein                                           | 2   | 1 | 38.8  | 8.16  | 0.001152 |
| D2SNS6 | Aldehyde dehydrogenase (Fragment)                                 | 4   | 1 | 17.7  | 5.29  | 1.80E-06 |
| G6D3R7 | Cytidylate kinase                                                 | 1   | 2 | 22.3  | 6.77  | 0.000278 |
| G6D794 | Vacuolar protein sorting-associated protein VTA1-like protein     | 2   | 2 | 29.3  | 4.81  | 0.00491  |
| G6D689 | U2 small nuclear ribonucleoprotein A                              | 2   | 2 | 29.7  | 8.6   | 0.000439 |
| H9JSN0 | Uncharacterized protein                                           | 3   | 1 | 45.1  | 6.77  | 0.005918 |
| G6CP89 | Uncharacterized protein                                           | 2   | 1 | 9.2   | 7.42  | 0.003722 |
| S4P5Y2 | Liquid facets (Fragment)                                          | 3   | 2 | 22.6  | 8.85  | 0.029308 |
| H9JCH9 | Uncharacterized protein                                           | 3   | 2 | 19.8  | 9.38  | 0.000717 |
| I4DQ01 | Clathrin coat assembly protein orange                             | 3   | 2 | 21.7  | 5.4   | 2.70E-05 |
| S4P4S4 | Uncharacterized protein (Fragment)                                | 1   | 1 | 7.6   | 9.64  | 0.04038  |
| H9JAP5 | Uncharacterized protein                                           | 25  | 3 | 31.4  | 6.64  | 0.014906 |

|        |                                                                    |   |   |       |       |          |
|--------|--------------------------------------------------------------------|---|---|-------|-------|----------|
| S4PW23 | Serine hydroxymethyltransferase                                    | 1 | 1 | 51.5  | 7.46  | 0.044258 |
| B2DBK1 | Karyopherin beta 3                                                 | 2 | 2 | 121.9 | 4.83  | 0.011642 |
| G6CPM9 | Ribosomal protein S34                                              | 1 | 2 | 22.4  | 9.63  | 5.98E-07 |
| H9IZJ3 | Uncharacterized protein                                            | 1 | 1 | 44.8  | 7.66  | 0.015169 |
| G6DT06 | Uncharacterized protein                                            | 1 | 2 | 81.3  | 7.49  | 0.002995 |
| G9FL14 | DNA supercoiling factor                                            | 2 | 1 | 38    | 4.64  | 0.000953 |
| H9JR08 | Uncharacterized protein                                            | 3 | 1 | 68.9  | 6.95  | 0.000334 |
| S4PN79 | UDP-glucose 4-epimerase (Fragment)                                 | 1 | 1 | 10.6  | 7.59  | 0.000327 |
| D9N4J4 | Tudor staphylococcus/micrococcal nuclease                          | 4 | 2 | 98.8  | 8.37  | 0.024713 |
| G6D4D4 | Putative membrane trafficking protein emp24/gp25/p24 family member | 4 | 1 | 11.3  | 6.05  | 0.002893 |
| H9J1U7 | DNA-directed RNA polymerase                                        | 7 | 1 | 205.9 | 7.97  | 0.000146 |
| G6CVH5 | Aspartyl-tRNA synthetase                                           | 2 | 1 | 37    | 6.62  | 2.38E-05 |
| S4PBL3 | Polypeptide N-acetylgalactosaminyltransferase 5 (Fragment)         | 1 | 1 | 31.5  | 7.18  | 0.046104 |
| S4P7Q9 | Myotubularin-related protein 2 (Fragment)                          | 2 | 1 | 54.6  | 9     | 0.001038 |
| V9VJY0 | R2D2                                                               | 1 | 2 | 36.7  | 6.2   | 1.47E-05 |
| S4P487 | Uncharacterized protein (Fragment)                                 | 1 | 1 | 10.8  | 8.87  | 1.94E-05 |
| G6DQA4 | Myosin vi                                                          | 5 | 6 | 139.9 | 8.76  | 0.000523 |
| G6DI16 | Coatmer protein complex subunit alpha                              | 1 | 1 | 67.7  | 8.59  | 0.049657 |
| G6CX60 | Putative Huntingtin interacting protein K                          | 3 | 1 | 13.4  | 4.92  | 4.73E-05 |
| G6DAQ7 | Uncharacterized protein                                            | 2 | 1 | 15.5  | 8.97  | 0.000129 |
| S4PS76 | Glycine N-methyltransferase (Fragment)                             | 2 | 1 | 23.4  | 5.64  | 0.001043 |
| G6CIK4 | Putative mitochondrial processing peptidase alpha subunit          | 1 | 1 | 10.2  | 10.35 | 0.002135 |
| I4DNH5 | Protein disulfide-isomerase A6 (Fragment)                          | 4 | 2 | 35.6  | 8.75  | 5.08E-05 |
| I4DNI3 | Similar to CG1969                                                  | 4 | 1 | 11.7  | 7.08  | 0.001928 |
| S4PRZ2 | Glia maturation factor beta (Fragment)                             | 3 | 1 | 15.2  | 5.17  | 2.78E-06 |
| H9J2S8 | Uncharacterized protein                                            | 2 | 2 | 45.1  | 9.33  | 1.92E-06 |
| R4ITA8 | CG1785-like protein                                                | 1 | 2 | 53.5  | 9.98  | 0.008707 |
| D3GDM2 | Antennal esterase CXE11                                            | 1 | 1 | 60.1  | 5.88  | 0.00068  |
| G6CKL9 | HSP90 cochaperone CDC37-like proteinue                             | 1 | 2 | 43.2  | 5.26  | 0.004208 |
| H9J752 | Uncharacterized protein                                            | 1 | 1 | 29    | 5.16  | 0.009956 |
| H9JX14 | Uncharacterized protein                                            | 1 | 1 | 17.8  | 5.43  | 0.000398 |

|        |                                                                 |   |   |       |       |          |
|--------|-----------------------------------------------------------------|---|---|-------|-------|----------|
| S4P8C3 | Cbl-d (Fragment)                                                | 3 | 1 | 17.8  | 5.52  | 0.000223 |
| I4DMW4 | UV excision repair protein rad23                                | 9 | 3 | 36.2  | 4.54  | 0.000256 |
| H9J051 | Uncharacterized protein                                         | 6 | 2 | 22.9  | 8.63  | 0.000215 |
| G6DIH8 | Clustered mitochondria protein homolog                          | 4 | 9 | 177.8 | 7.05  | 0.005048 |
| H9JHI6 | Uncharacterized protein                                         | 1 | 1 | 17.1  | 5.92  | 0.001007 |
| H9JQJ7 | Uncharacterized protein                                         | 2 | 1 | 16.4  | 7.3   | 0.000219 |
| H9JFY6 | Uncharacterized protein                                         | 2 | 2 | 40.4  | 7.12  | 0.001968 |
| Q1HQB5 | S-adenosylmethionine synthase                                   | 4 | 2 | 44.5  | 6.4   | 0.000693 |
| G6D354 | THO complex subunit 2                                           | 1 | 1 | 149.6 | 8.07  | 0.000353 |
| H9JH77 | Uncharacterized protein                                         | 3 | 2 | 49.4  | 5.29  | 0.007221 |
| D2SNL0 | Oxidoreductase (Fragment)                                       | 3 | 2 | 31.3  | 6.11  | 0.0007   |
| S4PB07 | Nucleoporin NUP85 (Fragment)                                    | 1 | 1 | 13.3  | 8.51  | 0.047205 |
| S4NZV0 | Metalloprotease (Fragment)                                      | 1 | 1 | 12.2  | 6.8   | 3.59E-06 |
| H9ISH7 | Uncharacterized protein                                         | 2 | 1 | 116.9 | 8.7   | 0.023513 |
| J9XNW6 | Autophagy related protein Atg4-like protein (Fragment)          | 1 | 2 | 41.4  | 4.98  | 3.01E-05 |
| H9JDY4 | Uncharacterized protein                                         | 3 | 1 | 30.3  | 11.55 | 2.03E-07 |
| G6CQB4 | Phosphatidylinositol glycan                                     | 3 | 2 | 39.7  | 7.83  | 0.001312 |
| G6DT55 | Uncharacterized protein                                         | 1 | 1 | 18.3  | 4.65  | 0.03057  |
| G6CX56 | Uncharacterized protein                                         | 1 | 1 | 32.4  | 4.41  | 6.10E-05 |
| G6CJU9 | Mitochondrial aldehyde dehydrogenase                            | 3 | 1 | 14.9  | 8.62  | 0.010131 |
| G6D7A4 | Uncharacterized protein                                         | 1 | 1 | 43.7  | 7.33  | 1.67E-05 |
| G6D8L6 | Mitochondrial import inner membrane translocase subunit TIM50-C | 2 | 2 | 38.1  | 6.6   | 0.001188 |
| S4P7F7 | Protein FAM98A (Fragment)                                       | 2 | 1 | 19.4  | 5.06  | 0.000644 |
| S4PEA4 | Suppressor of G2 allele of SKP1-like protein (Fragment)         | 3 | 1 | 19.7  | 5.22  | 1.06E-05 |
| G6DKG9 | UDP-glucosyltransferase protein 3                               | 1 | 1 | 14.2  | 10.33 | 5.77E-06 |
| H9JQK7 | Uncharacterized protein                                         | 1 | 1 | 40    | 7.58  | 0.012592 |
| H9JEI1 | Uncharacterized protein                                         | 2 | 2 | 72.7  | 7.42  | 0.000261 |
| S4PE88 | Nicotinate phosphoribosyltransferase (Fragment)                 | 1 | 1 | 20.7  | 6.52  | 0.000276 |
| I4DNR5 | Transcription factor TFIIFbeta                                  | 3 | 1 | 18.4  | 9.31  | 0.001426 |
| H9J2E4 | Uncharacterized protein                                         | 6 | 1 | 17.2  | 8.48  | 3.26E-05 |
| G6DP49 | Uncharacterized protein                                         | 2 | 2 | 131.6 | 6.73  | 4.65E-06 |
| G6CV32 | Putative phosphatase 2C beta                                    | 1 | 1 | 42.3  | 4.89  | 0.000577 |
| H9JBG4 | Uncharacterized protein                                         | 1 | 1 | 16.5  | 7.01  | 0.000255 |
| H9IT11 | Uncharacterized protein                                         | 3 | 1 | 146.8 | 6.3   | 0.000596 |
| G6DLM7 | Uncharacterized protein                                         | 1 | 1 | 31.7  | 8.57  | 5.44E-07 |
| H9JU60 | Uncharacterized protein                                         | 3 | 2 | 58.9  | 8.27  | 5.45E-05 |

|        |                                                        |     |   |       |      |          |
|--------|--------------------------------------------------------|-----|---|-------|------|----------|
| S4P621 | Programmed cell death 6-interacting protein (Fragment) | 1   | 1 | 20    | 7.37 | 0.001152 |
| Q1HQ07 | 1110059p08rik-like protein                             | 1   | 2 | 34.3  | 5.39 | 5.73E-05 |
| G6D1A4 | Putative WD repeat protein 26                          | 1   | 2 | 61.9  | 6.74 | 0.000973 |
| G6DDK6 | Uncharacterized protein                                | 2   | 1 | 23.7  | 6.44 | 0.004437 |
| S4NN06 | Hsc70-interacting protein 1 (Fragment)                 | 1   | 1 | 32.8  | 4.94 | 0.001576 |
| G6DPV5 | Putative Tetratricopeptide repeat protein 1            | 2   | 1 | 21.3  | 4.73 | 0.00073  |
| G6D6P8 | Uncharacterized protein                                | 3   | 1 | 53.7  | 9.14 | 0.033124 |
| H9JRQ9 | Uncharacterized protein                                | 3   | 2 | 37.8  | 8.62 | 0.005669 |
| H9ITA0 | Uncharacterized protein                                | 2   | 2 | 45.4  | 5.54 | 0.002746 |
| H9IY28 | Uncharacterized protein                                | 1   | 1 | 77    | 7.18 | 0.004539 |
| G6DFX7 | Putative isoleucyl tRNA synthetase                     | 2   | 1 | 138.2 | 7.56 | 9.97E-05 |
| M9T0T9 | ATP synthase subunit a (Fragment)                      | 116 | 1 | 18.1  | 9.32 | 0.002101 |
| B0LL83 | Pyruvate dehydrogenase kinase                          | 2   | 1 | 46.9  | 7.08 | 0.002149 |
| H9JJ62 | Uncharacterized protein                                | 3   | 2 | 79.8  | 5.73 | 0.000218 |
| G6CX02 | Protein BCCIP homolog                                  | 2   | 1 | 32.1  | 4.44 | 2.35E-06 |
| G6D5V7 | Adenylyl cyclase-associated protein                    | 1   | 1 | 57.6  | 6.11 | 0.001329 |
| G6DQ30 | Transcriptional regulator ATRX                         | 6   | 2 | 224.9 | 7.25 | 0.006427 |
| B2DBH5 | Putative uncharacterized protein                       | 1   | 1 | 29.6  | 4.36 | 0.023516 |
| S4PW98 | Smad nuclear interacting protein 1 (Fragment)          | 3   | 1 | 27.9  | 9.41 | 0.000554 |
| H9JLI9 | Uncharacterized protein                                | 2   | 1 | 20.6  | 5.48 | 1.25E-05 |
| S4PTH3 | B-cell receptor-associated protein 31                  | 1   | 1 | 25.3  | 7.94 | 2.97E-05 |
| H9IU37 | Uncharacterized protein                                | 1   | 1 | 62.9  | 6.3  | 1.61E-05 |
| S4PCM2 | Interferon regulatory factor 2-binding protein 2-A     | 2   | 1 | 45.3  | 8.54 | 0.001478 |
| G6CRM2 | Uncharacterized protein                                | 1   | 1 | 25.1  | 8.24 | 0.001057 |
| H9J7D4 | Uncharacterized protein                                | 1   | 1 | 49.4  | 8.6  | 0.000299 |
| G6DG28 | Uncharacterized protein                                | 3   | 1 | 51.5  | 8.92 | 0.002161 |
| Q3V5Y5 | Carotenoid-binding protein (Fragment)                  | 8   | 1 | 23.3  | 5.5  | 0.000539 |
| G6DMD9 | Uncharacterized protein                                | 1   | 1 | 21.8  | 9.13 | 0.000141 |
| Q8T9W9 | cGMP-dependent protein kinase                          | 11  | 3 | 83.9  | 6.06 | 3.46E-06 |
| H9J9X5 | Uncharacterized protein                                | 2   | 1 | 22.7  | 4.73 | 0.003455 |
| S4PEX9 | DNA polymerase                                         | 5   | 2 | 67.2  | 8.76 | 0.009825 |
| E9LFS8 | Cytochrome c oxidase subunit 1 (Fragment)              | 1   | 1 | 22.6  | 4.98 | 1.75E-05 |
| I4DNC1 | Cytochrome C1 (Fragment)                               | 5   | 1 | 33    | 8.05 | 1.38E-05 |
| S4NNL1 | UDP-glucose:glycoprotein glucosyltransferase           | 3   | 1 | 88.8  | 6.07 | 0.006069 |
| G6DK55 | Uncharacterized protein                                | 3   | 1 | 54.7  | 5.92 | 0.000625 |

|        |                                              |    |   |       |       |          |
|--------|----------------------------------------------|----|---|-------|-------|----------|
| H9JU86 | Uncharacterized protein                      | 2  | 1 | 28.1  | 7.25  | 9.16E-05 |
| H9JK13 | Uncharacterized protein                      | 1  | 1 | 25.6  | 8.5   | 0.000427 |
| G6D8L4 | Sorbitol dehydrogenase                       | 3  | 1 | 28.7  | 8.18  | 0.04319  |
| Q1HPT3 | Heterogeneous nuclear ribonucleoprotein A1   | 1  | 1 | 35    | 7.06  | 0.042593 |
| G6CNY0 | Uncharacterized protein                      | 2  | 1 | 103.1 | 7.27  | 0.005758 |
| H9JQH9 | Uncharacterized protein                      | 2  | 1 | 26.2  | 8.1   | 0.00152  |
| O77129 | Period (Fragment)                            | 1  | 1 | 37.7  | 5.95  | 2.82E-05 |
| S4PL34 | Nuclear RNA export factor 1                  | 3  | 1 | 50.8  | 7.21  | 0.005581 |
| G6D2U8 | Uncharacterized protein                      | 10 | 1 | 26.2  | 10.43 | 0.020337 |
| H9J5V8 | Uncharacterized protein                      | 2  | 1 | 88.1  | 8.94  | 0.01787  |
| H9JCQ2 | Uncharacterized protein                      | 1  | 1 | 36.4  | 8.98  | 1.19E-05 |
| G6D3G4 | Uncharacterized protein                      | 1  | 2 | 115.8 | 5.86  | 2.85E-05 |
| H9JRV8 | Uncharacterized protein                      | 2  | 1 | 35.6  | 5.78  | 2.98E-05 |
| S4NSX0 | Pre-mRNA-splicing factor RBM22               | 3  | 1 | 45.6  | 8.59  | 0.016475 |
| H9JFV2 | Uncharacterized protein                      | 1  | 1 | 118.9 | 7.06  | 0.001079 |
| H9J214 | Uncharacterized protein                      | 2  | 1 | 33.5  | 9.47  | 1.67E-06 |
| H9JEG2 | Uncharacterized protein (Fragment)           | 2  | 1 | 124.7 | 7.03  | 0.000979 |
| G6CIU6 | Uncharacterized protein                      | 2  | 1 | 184.4 | 6.34  | 0.00911  |
| H9JPT1 | Uncharacterized protein                      | 1  | 1 | 49    | 8.06  | 0.026888 |
| S4PX05 | Sortilin-related receptor (Fragment)         | 1  | 1 | 44.8  | 5.88  | 0.003655 |
| G6CSA9 | Ultrathorax binding protein 1                | 1  | 1 | 44.9  | 8.35  | 0.048667 |
| G6DGI3 | Putative WD-repeat protein                   | 2  | 1 | 46.2  | 8.68  | 0.000761 |
| H9JU67 | Uncharacterized protein                      | 1  | 1 | 145.3 | 8.53  | 0.000462 |
| I4DJM3 | Metalloendopeptidase                         | 2  | 1 | 47.4  | 6.93  | 0.003814 |
| G6CUI8 | Uncharacterized protein                      | 1  | 1 | 44.3  | 4.77  | 0.003793 |
| S4NNP8 | Scraps (Fragment)                            | 3  | 1 | 44    | 6.1   | 0.002888 |
| G6DP16 | Uncharacterized protein                      | 1  | 1 | 92.8  | 5.3   | 0.000207 |
| G6DBR6 | Prolactin regulatory binding-element protein | 4  | 1 | 45.5  | 8.56  | 5.74E-05 |
| G6CMI3 | Uncharacterized protein                      | 1  | 1 | 42.5  | 8.19  | 0.00046  |
| H9JUP2 | Uncharacterized protein                      | 3  | 1 | 42.1  | 5.76  | 0.000623 |
| G6DCM1 | Uncharacterized protein                      | 1  | 1 | 56    | 5.26  | 6.54E-07 |
| G6DRI3 | Uncharacterized protein                      | 4  | 3 | 200.4 | 5.12  | 0.000344 |
| I4DNR0 | Uncharacterized protein                      | 4  | 1 | 43.4  | 4.94  | 0.000243 |
| H9JFU5 | Uncharacterized protein                      | 2  | 1 | 64    | 7.93  | 0.002013 |
| H9JDN4 | Uncharacterized protein                      | 1  | 1 | 54.3  | 7.17  | 1.50E-05 |
| G6D0X1 | Putative ebna2 binding protein P100          | 1  | 3 | 250.8 | 5.08  | 0.008573 |
| A5JPL9 | MSL3 protein                                 | 4  | 1 | 62.4  | 5.5   | 0.029685 |
| H9JQY1 | Uncharacterized protein                      | 1  | 1 | 53.6  | 7.74  | 0.000482 |
| S4NSU9 | Succinyl-coa synthetase beta chain           | 1  | 1 | 49.8  | 6.81  | 0.002049 |
| V9VJY3 | Dicer 1 (Fragment)                           | 1  | 1 | 153.9 | 5.26  | 0.000123 |
| Q53EK0 | Prolyl 4-hydroxylase alpha subunit           | 1  | 1 | 63.7  | 6.3   | 3.62E-05 |

|        |                                           |      |    |        |       |          |
|--------|-------------------------------------------|------|----|--------|-------|----------|
| G6DB46 | Midasin                                   | 2    | 1  | 587.8  | 5.39  | 3.11E-05 |
| H9JSF9 | Uncharacterized protein                   | 1    | 1  | 129.1  | 5.76  | 3.93E-05 |
| G6DDK9 | Uncharacterized protein                   | 1    | 1  | 70.5   | 10.32 | 0.000343 |
| H9J8V4 | Uncharacterized protein                   | 3    | 1  | 75.9   | 5.19  | 0.005108 |
| H9IX25 | Uncharacterized protein                   | 2    | 1  | 74.1   | 8.07  | 0.033602 |
| G6CYN2 | Uncharacterized protein                   | 2    | 1  | 76     | 7.83  | 4.06E-05 |
| G6DGG9 | Endonuclease-reverse transcriptase        | 1    | 1  | 82.5   | 9.73  | 0.038186 |
| G6CNG9 | Cysteinyl-tRNA synthetase                 | 1    | 1  | 83.9   | 6.48  | 1.29E-05 |
| G6DFF9 | Phosphoglucomutase                        | 1    | 1  | 68.1   | 5.48  | 0.000157 |
| G6CUR1 | Hemicentin-1                              | 1    | 1  | 71.8   | 7.4   | 0.000407 |
| H9J651 | Uncharacterized protein                   | 1    | 1  | 75.8   | 9.33  | 6.97E-05 |
| H9JLR9 | Uncharacterized protein                   | 4    | 10 | 1538.9 | 5.08  | 2.94E-05 |
| H9ISY0 | Uncharacterized protein                   | 2    | 1  | 109    | 8.31  | 0.000173 |
| H9JIE7 | Uncharacterized protein                   | 2    | 1  | 149.3  | 6.98  | 6.52E-05 |
| D0VY44 | Neuroglian                                | 1    | 1  | 139.9  | 6.11  | 0.024891 |
| G6D6E9 | DNA polymerase                            | 1    | 1  | 187    | 6.28  | 0.017575 |
| D9D6W7 | Elongation factor-1 alpha (Fragment)      | 45   | 1  | 16.9   | 8.02  | 0.003124 |
| V5LFB1 | Elongation factor 1 alpha (Fragment)      | 107  | 1  | 20.3   | 7.91  | 2.11E-06 |
| F0UYY3 | Thymosin isoform 2                        | 6    | 1  | 14.7   | 5.05  | 3.51E-06 |
| E9LFT9 | Elongation factor-1 alpha (Fragment)      | 244  | 1  | 18     | 8.28  | 8.43E-05 |
| E2EG74 | Elongation factor 1 alpha (Fragment)      | 244  | 1  | 18     | 8.29  | 0.001862 |
| H9JJE6 | Histone H4                                | 4    | 1  | 11.4   | 11.36 | 2.34E-07 |
| Q5QE34 | Elongation factor 1-alpha (Fragment)      | 401  | 1  | 37.8   | 7.49  | 0.016148 |
| E2EG63 | Elongation factor 1 alpha (Fragment)      | 33   | 1  | 18     | 8.29  | 0.00048  |
| O44308 | Elongation factor 1-alpha (Fragment)      | 1878 | 1  | 45.1   | 8.48  | 7.32E-07 |
| D4P236 | Elongation factor 1 alpha (Fragment)      | 30   | 1  | 28     | 7.03  | 0.003385 |
| H9JFB9 | Uncharacterized protein                   | 1    | 1  | 5.4    | 8     | 0.014269 |
| E2EG88 | Elongation factor 1 alpha (Fragment)      | 4    | 1  | 16.7   | 8.29  | 0.022567 |
| C7E8S9 | Elongation factor 1-alpha (Fragment)      | 612  | 1  | 42.7   | 8.41  | 0.028096 |
| D4P290 | Elongation factor 1 alpha (Fragment)      | 178  | 2  | 26.3   | 6.4   | 0.015201 |
| H9JY79 | Histone H2A                               | 1    | 2  | 7.7    | 9.52  | 0.00017  |
| D1LAB2 | Elongation factor 1-alpha (Fragment)      | 604  | 1  | 45     | 8.34  | 0.03837  |
| E9LFU9 | Elongation factor-1 alpha (Fragment)      | 7    | 2  | 25.4   | 8.51  | 0.041823 |
| G3K8R2 | Heat shock protein (Fragment)             | 108  | 2  | 37.3   | 5.15  | 0.004125 |
| H9JMB5 | Uncharacterized protein                   | 1    | 1  | 10.1   | 5.48  | 0.006066 |
| H9JX71 | Uncharacterized protein                   | 3    | 2  | 47.2   | 6.48  | 0.000431 |
| G6CL94 | Uncharacterized protein                   | 21   | 1  | 28.2   | 5.68  | 0.000124 |
| I4DRR2 | Splicing factor pTSR1 (Fragment)          | 1    | 1  | 25.6   | 8.24  | 0.000166 |
| S4PIE3 | Neuropathy target esterase sws (Fragment) | 1    | 1  | 9.8    | 4.88  | 0.000223 |
| Q5EPW0 | Elongation factor 1 alpha (Fragment)      | 125  | 2  | 38.5   | 8.05  | 0.022192 |
| G6DAB3 | Ribosomal protein L1                      | 14   | 1  | 28.6   | 9.82  | 0.000152 |



|        |                                                                             |     |   |       |       |          |
|--------|-----------------------------------------------------------------------------|-----|---|-------|-------|----------|
| D3X5P2 | Ribosomal protein S5 (Fragment)                                             | 46  | 1 | 21.1  | 9.57  | 0.000923 |
| H9IZ08 | Uncharacterized protein                                                     | 1   | 3 | 42.1  | 7.44  | 0.000788 |
| H9J567 | Proteasome subunit alpha type                                               | 3   | 1 | 27.1  | 6.9   | 0.001203 |
| F8UEY1 | Glyceraldehyde-3-phosphate dehydrogenase (Fragment)                         | 378 | 1 | 22    | 7.37  | 0.020499 |
| S4NL80 | Pleckstrin-like domain-containing family F member 2-like protein (Fragment) | 1   | 1 | 9     | 10.01 | 6.18E-05 |
| E2IV54 | V ATPase A (Fragment)                                                       | 1   | 2 | 33.2  | 5.52  | 0.00017  |
| H9IUJ6 | Transaldolase                                                               | 3   | 1 | 37.1  | 7.2   | 0.013105 |
| S4PMM4 | Transgelin                                                                  | 4   | 1 | 20.9  | 7.75  | 6.52E-06 |
| H9J1K4 | Uncharacterized protein (Fragment)                                          | 4   | 2 | 12.7  | 9.95  | 0.03715  |
| S4PXM6 | DNA replication licensing factor Mcm6 (Fragment)                            | 1   | 1 | 56    | 6.86  | 0.006464 |
| H9JBL2 | Isocitrate dehydrogenase [NADP]                                             | 134 | 1 | 46.1  | 6.7   | 4.55E-07 |
| S4PSE3 | Lark (Fragment)                                                             | 1   | 1 | 32.5  | 8.88  | 0.00609  |
| Q2F5S1 | Microtubule-associated protein RP/EB family member 3                        | 4   | 1 | 30.5  | 5.71  | 5.97E-05 |
| H9JMJ8 | Uncharacterized protein                                                     | 2   | 1 | 19    | 9.13  | 0.000767 |
| Q8ISR4 | QM protein (Fragment)                                                       | 1   | 1 | 6.3   | 9.76  | 0.038105 |
| S4NTC3 | eIF5B                                                                       | 2   | 1 | 69.5  | 8.25  | 1.26E-05 |
| Q1HQC0 | Mitochondrial ribosomal protein S21                                         | 3   | 2 | 11.7  | 10.07 | 0.002409 |
| S4PD63 | Diadenosine tetraphosphatase                                                | 3   | 2 | 16.1  | 5.52  | 0.005135 |
| H9JFI7 | Uncharacterized protein                                                     | 2   | 1 | 38.2  | 8.97  | 0.030142 |
| I4DL89 | Coiled-coil domain-containing protein 72 homolog                            | 1   | 1 | 7     | 10.05 | 0.001843 |
| Q1HPQ3 | Transcription initiation factor IIA subunit 2                               | 2   | 1 | 12.5  | 8.81  | 0.000533 |
| G6D1T2 | Heat shock protein 70                                                       | 1   | 1 | 82.7  | 9.31  | 5.86E-06 |
| S4PT88 | Dodo OS=Pararge aegeria PE=4 SV=1 - [S4PT88_9NEOP]                          | 2   | 1 | 17.8  | 7.99  | 7.87E-05 |
| S4PI06 | Ubiquitin-specific protease (Fragment)                                      | 2   | 1 | 8.2   | 10.01 | 0.028797 |
| G6DH38 | Uncharacterized protein                                                     | 3   | 2 | 19.4  | 8.59  | 4.61E-05 |
| G6CY74 | Malic enzyme                                                                | 3   | 7 | 63.3  | 6.7   | 2.55E-05 |
| H9J5Q7 | Uncharacterized protein                                                     | 1   | 4 | 34.7  | 5     | 0.001908 |
| G6CTV3 | Isocitrate dehydrogenase                                                    | 3   | 1 | 42.5  | 7.72  | 3.32E-05 |
| S4NNK0 | Spectrin beta chain (Fragment)                                              | 1   | 3 | 148.2 | 5.07  | 2.64E-05 |
| G6DL52 | Putative DNA-directed RNA polymerase II 13.3 kDa polypeptide                | 4   | 2 | 13.5  | 5.83  | 1.85E-06 |
| I4DJD2 | Eclair                                                                      | 3   | 2 | 25    | 7.18  | 0.008024 |
| I4DMG3 | Ribosomal protein L6                                                        | 7   | 2 | 30.7  | 10.92 | 3.78E-06 |
| S4P7Y9 | Putative leucine-rich                                                       | 1   | 1 | 7.7   | 9.16  | 0.003021 |

|        |                                                                             |    |   |      |       |          |
|--------|-----------------------------------------------------------------------------|----|---|------|-------|----------|
|        | repeat-containing protein 47-like protein (Fragment)                        |    |   |      |       |          |
| G6CQI5 | V-type proton ATPase subunit G                                              | 7  | 1 | 8.9  | 5.1   | 2.72E-05 |
| S4PGF1 | Cullin-associated NEDD8-dissociated protein (Fragment)                      | 1  | 1 | 16.3 | 7.84  | 0.000111 |
| G6CWF2 | Putative nuclear inhibitor of protein phosphatase-1                         | 1  | 2 | 38.6 | 7.93  | 0.005303 |
| S4P4F1 | NMDA receptor-regulated protein (Fragment)                                  | 1  | 1 | 9.3  | 6.04  | 1.87E-05 |
| S4NXV8 | Guanine nucleotide-binding protein-like 3-like protein (Fragment)           | 1  | 2 | 35.8 | 9.45  | 0.039169 |
| B2DBN5 | Nucleosome assembly protein                                                 | 2  | 1 | 44.7 | 4.81  | 0.043105 |
| H9J2D4 | Uncharacterized protein                                                     | 1  | 1 | 44.2 | 6.58  | 0.00181  |
| I4DID4 | Ribosomal protein L6                                                        | 18 | 1 | 30.7 | 10.73 | 3.50E-06 |
| H9JB76 | Peptidyl-prolyl cis-trans isomerase                                         | 4  | 2 | 20.3 | 7.27  | 0.002662 |
| G6CX25 | Coatomer protein complex subunit delta                                      | 1  | 1 | 62.8 | 8.44  | 3.18E-06 |
| H9JY38 | Galectin                                                                    | 3  | 2 | 24.3 | 6.77  | 0.000488 |
| L7R0E7 | GTP-binding protein (Fragment)                                              | 1  | 1 | 31.6 | 5.78  | 0.000243 |
| H9J6E3 | Uncharacterized protein                                                     | 3  | 1 | 11.9 | 6.3   | 0.005418 |
| H9ISK3 | Uncharacterized protein                                                     | 2  | 1 | 32.3 | 6.79  | 0.001323 |
| G6CWA4 | Hydroxyacyl-coenzyme A dehydrogenase                                        | 1  | 1 | 82.3 | 8.98  | 4.77E-06 |
| H9JA67 | Uncharacterized protein                                                     | 4  | 1 | 10   | 8.92  | 1.17E-05 |
| S4PCQ8 | Uncharacterized protein (Fragment)                                          | 1  | 1 | 10.7 | 5.25  | 0.02039  |
| G6DQ02 | Dolichyl-diphosphooligosaccharide--protein glycosyltransferase subunit DAD1 | 4  | 1 | 12.6 | 8.18  | 0.000858 |
| I4DME2 | Gamma-subunit,methylmalonyl-CoA decarboxylase                               | 4  | 1 | 14.5 | 8.24  | 0.000206 |
| H9IV94 | Uncharacterized protein                                                     | 2  | 1 | 25.4 | 6.67  | 7.59E-06 |
| H9JPK6 | Uncharacterized protein                                                     | 1  | 1 | 40.7 | 8.84  | 3.32E-05 |
| A1Z076 | ELAV-like protein                                                           | 2  | 1 | 30.4 | 9.48  | 0.010036 |
| I4DP00 | Similar to CG1416                                                           | 1  | 1 | 36.7 | 8.15  | 0.000269 |
| S4PEG4 | Alpha-1,3/1,6-mannosyltransferase ALG2 (Fragment)                           | 2  | 1 | 26.1 | 8.65  | 1.37E-05 |
| H9J3E2 | Uncharacterized protein                                                     | 3  | 1 | 30.1 | 7.59  | 0.00012  |
| Q9NKX2 | Nonclathrin coat protein gamma2-COP (Fragment)                              | 2  | 1 | 95.1 | 5.55  | 0.019877 |
| G6CTH3 | Replication protein A3                                                      | 1  | 1 | 14.6 | 4.55  | 8.31E-05 |
| A9XTS8 | cAMP response element binding protein 1                                     | 4  | 2 | 28.1 | 8.31  | 0.005285 |
| G6DAL3 | Putative Tubulin-specific chaperone                                         | 3  | 2 | 27.9 | 5.06  | 0.000612 |

|        | B                                                                              |   |   |       |      |          |
|--------|--------------------------------------------------------------------------------|---|---|-------|------|----------|
| S4PB31 | Coatomer protein complex subunit zeta                                          | 1 | 1 | 20.7  | 5.14 | 0.000292 |
| S4PKX7 | Protein disulfide-isomerase                                                    | 4 | 1 | 54.8  | 5.68 | 2.77E-05 |
| G6DIN8 | Uncharacterized protein                                                        | 3 | 2 | 37.3  | 6.47 | 8.89E-07 |
| G6D0D4 | Uncharacterized protein                                                        | 1 | 2 | 89.9  | 5.11 | 0.034132 |
| S4PXE2 | Dystroglycan                                                                   | 3 | 3 | 69.4  | 5.41 | 6.59E-05 |
| G6CWH0 | Putative GTP cyclohydrolase 1 type 2                                           | 3 | 1 | 29.8  | 5.87 | 0.004591 |
| S4P781 | Putative E3 ubiquitin-protein ligase UBR7                                      | 1 | 1 | 23.1  | 8.54 | 0.000159 |
| H9J119 | Uncharacterized protein                                                        | 1 | 1 | 23.9  | 7.31 | 0.0083   |
| G6CPN3 | Protein disulfide-isomerase                                                    | 4 | 1 | 54.7  | 5.53 | 0.010141 |
| Q1HPY2 | Transcription initiation factor TFIID subunit 12                               | 1 | 1 | 19.6  | 7.05 | 0.021782 |
| H9JJB7 | GrpE protein homolog                                                           | 2 | 1 | 24.1  | 7.46 | 2.56E-05 |
| G6CSN6 | Putative specifically Rac-associated protein                                   | 2 | 1 | 145.6 | 7.31 | 0.000288 |
| G6DBD4 | Uncharacterized protein                                                        | 1 | 1 | 40.3  | 7.52 | 0.001671 |
| H9J1Q2 | Uncharacterized protein                                                        | 2 | 1 | 20.2  | 8.97 | 2.00E-05 |
| H9JYI5 | Uncharacterized protein                                                        | 1 | 1 | 24.7  | 8.79 | 1.03E-05 |
| G6CMU4 | Proteasome 26S non-ATPase subunit 9                                            | 1 | 1 | 21.8  | 6.6  | 0.004569 |
| G6CP01 | Uncharacterized protein                                                        | 2 | 1 | 71.9  | 7.06 | 0.004183 |
| S4P8U1 | Dihydrolipoamide succinyltransferase component of 2-oxoglutarate dehydrogenase | 3 | 1 | 49.7  | 9.19 | 0.036982 |
| S4P5W3 | Phospholipase A-2-activating protein (Fragment)                                | 1 | 1 | 27.4  | 5.68 | 2.15E-05 |
| S4PRG7 | Uncharacterized protein                                                        | 2 | 1 | 32.6  | 5.4  | 3.07E-05 |
| G6D396 | Uncharacterized protein                                                        | 1 | 1 | 32.4  | 7.25 | 0.015762 |
| I4DPQ6 | Mitochondrial ribosomal protein S22 (Fragment)                                 | 1 | 1 | 41.2  | 7.01 | 1.21E-05 |
| S4PD38 | Serine palmitoyltransferase 1 (Fragment)                                       | 3 | 1 | 34.7  | 7.12 | 0.002565 |
| G6CQ97 | Uncharacterized protein                                                        | 3 | 1 | 47.9  | 5.48 | 5.45E-08 |
| H9JF59 | Uncharacterized protein                                                        | 1 | 1 | 44.2  | 9.86 | 6.96E-06 |
| G6DJ60 | Uncharacterized protein                                                        | 1 | 1 | 26.6  | 9.45 | 0.001179 |
| S4PDY1 | Protein PRRC1                                                                  | 1 | 1 | 41.8  | 4.84 | 5.88E-05 |
| I4DNQ4 | tRNA selenocysteine associated protein secp43 (Fragment)                       | 1 | 1 | 33.1  | 5.36 | 0.000742 |
| G6CIX7 | Uncharacterized protein                                                        | 2 | 1 | 165.5 | 5.5  | 0.007906 |
| H9ITJ2 | Uncharacterized protein                                                        | 2 | 1 | 47.3  | 5.12 | 0.000956 |
| H9J2G3 | Uncharacterized protein                                                        | 2 | 1 | 188.6 | 7.91 | 0.000107 |

|        |                                                    |      |   |       |       |          |
|--------|----------------------------------------------------|------|---|-------|-------|----------|
| G6CT34 | Uncharacterized protein                            | 1    | 1 | 83.6  | 9.89  | 5.91E-05 |
| S4PTG2 | Eukaryotic initiation factor 4B protein (Fragment) | 1    | 1 | 63.2  | 9.07  | 7.57E-06 |
| H9JSK3 | Uncharacterized protein                            | 2    | 2 | 117.5 | 5.81  | 3.93E-05 |
| H9JI79 | Uncharacterized protein                            | 1    | 1 | 50    | 6.73  | 0.000205 |
| S4PG29 | Uncharacterized protein                            | 1    | 1 | 54.2  | 9.94  | 0.001134 |
| H9J971 | Uncharacterized protein                            | 1    | 1 | 63.3  | 7.66  | 0.030812 |
| G6CRF5 | Uncharacterized protein                            | 1    | 1 | 83.3  | 6.39  | 0.002194 |
| Q8I864 | Ribosomal protein S9 (Fragment)                    | 1    | 2 | 12.8  | 10.58 | 1.33E-05 |
| I6LGE9 | Elongation factor 1-alpha (Fragment)               | 1590 | 1 | 38    | 8.27  | 0.001831 |
| D3X5F2 | Elongation factor 1-alpha (Fragment)               | 1430 | 1 | 44.8  | 8.6   | 0.000262 |
| D4P251 | Elongation factor 1 alpha (Fragment)               | 262  | 2 | 28    | 7.03  | 0.004816 |
| G6D5P3 | 14-3-3 epsilon protein                             | 1    | 1 | 29.6  | 4.81  | 7.73E-06 |
| Q30CE1 | Elongation factor 1-alpha (Fragment)               | 507  | 1 | 42.3  | 8.69  | 0.012027 |
| Q5EPR3 | Elongation factor 1-alpha (Fragment)               | 451  | 1 | 38.5  | 8.05  | 0.009466 |
| G6DIF6 | Histone H4                                         | 3    | 1 | 15.7  | 11.5  | 0.001416 |
| Q2LAR4 | Elongation factor 1-alpha (Fragment)               | 648  | 1 | 44.5  | 7.97  | 0.01285  |
| W0ZFA9 | Elongation factor 1 alpha (Fragment)               | 2    | 1 | 7.4   | 7.18  | 5.64E-05 |
| G6CZR4 | ATPase inhibitor-like protein                      | 4    | 3 | 9.3   | 8.41  | 0.000749 |
| D3X5D0 | Elongation factor 1-alpha (Fragment)               | 23   | 1 | 43.6  | 7.72  | 0.001238 |
| G0ZEI0 | Ribosomal protein L28                              | 1    | 1 | 15.8  | 11.87 | 1.55E-05 |
| H9U396 | Heat shock protein 90 beta                         | 3    | 1 | 91.6  | 5.06  | 0.000105 |
| H9JE10 | Uncharacterized protein                            | 3    | 1 | 24.1  | 7.05  | 0.000925 |
| H9IUC3 | Uncharacterized protein                            | 3    | 3 | 173.3 | 8.59  | 0.049093 |
| G9LPR1 | UDP-glycosyltransferase UGT41D1                    | 1    | 1 | 57.4  | 9.07  | 0.009565 |
| D4P2D6 | Elongation factor 1 alpha (Fragment)               | 168  | 1 | 28.1  | 7.03  | 7.03E-08 |
| H9IXM2 | Uncharacterized protein                            | 2    | 1 | 34.2  | 9.7   | 0.014869 |
