# Supplementary material for: Comparative proteomics analysis of Spodoptera frugiperda cells during Autographa californica multiple nucleopolyhedrovirus infection
Source: Springer Nature journal article supplement (doi:10.1186/s12985-015-0346-9), 2015-08-03
Supplement: MOESM2 [file 9770280]

| Map ID  | Map Name                                    | Seqs                                                                                                                                                                                                                     | #Seqs | URL                                                                                                                                                                                                                                                                                                                                                                                                                                 |
|---------|---------------------------------------------|--------------------------------------------------------------------------------------------------------------------------------------------------------------------------------------------------------------------------|-------|-------------------------------------------------------------------------------------------------------------------------------------------------------------------------------------------------------------------------------------------------------------------------------------------------------------------------------------------------------------------------------------------------------------------------------------|
| ko04141 | Protein processing in endoplasmic reticulum | H9IZ19<br>Q3V6C6<br>Q8I6Y8<br>H9IT95<br>I4DMH6<br>I4DIQ3<br>I4DNK8<br>H9JSN0<br>I4DNH5<br>H9JX14<br>I4DMW4<br>S4PTH3<br>S4NNL1<br>H9JK13<br>H9J5V8<br>G6DBR6<br>H9J5Q7<br>G6DQ02<br>S4PKX7<br>G6CPN3<br>S4P5W3<br>H9U396 | 22    | <a href="http://www.kegg.jp/kegg-bin/show_pathway?ko04141+K07953+K04079+K03237+K08057+K08057+K09580+K04555+K09502+K09584+K09556+K10839+K14009+K11718+K14009+K07151+K14003+K14004+K12668+K08056+K08056+K14018+K09487">http://www.kegg.jp/kegg-bin/show_pathway?ko04141+K07953+K04079+K03237+K08057+K08057+K09580+K04555+K09502+K09584+K09556+K10839+K14009+K11718+K14009+K07151+K14003+K14004+K12668+K08056+K08056+K14018+K09487</a> |
| ko01200 | Carbon metabolism                           | B3TEH3<br>I4DP84<br>G0T406<br>L7R6U6<br>C9S271<br>D6BNT9<br>H9J814<br>G6CIZ7<br>G6CTA2<br>S4PW23<br>H9J2S8<br>H9JHI6<br>S4NSU9<br>H9JFB9<br>F8UEY1<br>H9IUJ6<br>H9JBL2<br>G6CY74<br>G6CTV3<br>G6CWA4<br>S4P8U1           | 21    | <a href="http://www.kegg.jp/kegg-bin/show_pathway?ko01200+K01689+K01647+K00121+K01689+K07511+K01810+K07511+K01803+K00600+K00600+K00658+K00627+K01900+K01679+K00134+K00616+K00031+K00029+K00030+K07515+K00658">http://www.kegg.jp/kegg-bin/show_pathway?ko01200+K01689+K01647+K00121+K01689+K07511+K01810+K07511+K01803+K00600+K00600+K00658+K00627+K01900+K01679+K00134+K00616+K00031+K00029+K00030+K07515+K00658</a>               |

|         |                      |                                                                                                                                                                                                      |    |                                                                                                                                                                                                                                                                                                                                                                                                         |
|---------|----------------------|------------------------------------------------------------------------------------------------------------------------------------------------------------------------------------------------------|----|---------------------------------------------------------------------------------------------------------------------------------------------------------------------------------------------------------------------------------------------------------------------------------------------------------------------------------------------------------------------------------------------------------|
| ko03010 | Ribosome             | Q8WQJ2<br>Q6F467<br>D1LYK5<br>Q5UAT9<br>E3UPC7<br>E3UUW3<br>S4NRF9<br>E7DZ32<br>Q95UN1<br>G6DME4<br>D1LYQ1<br>G6DAB3<br>D3X5P2<br>Q8ISR4<br>Q1HQC0<br>G6DH38<br>I4DMG3<br>I4DID4<br>Q8I864<br>G0ZEI0 | 20 | <a href="http://www.kegg.jp/kegg-bin/show_pathway?ko03010+K02941+K02962+K02870+K02943+K02908+K02922+K02958+K02929+K02990+K02942+K02905+K02865+K02989+K02866+K02970+K02967+K02934+K02934+K02997+K02903">http://www.kegg.jp/kegg-bin/show_pathway?ko03010+K02941+K02962+K02870+K02943+K02908+K02922+K02958+K02929+K02990+K02942+K02905+K02865+K02989+K02866+K02970+K02967+K02934+K02934+K02997+K02903</a> |
| ko03013 | RNA transport        | G6DKM8<br>B7SET3<br>Q8I6Y8<br>H9CV61<br>Q1HPW4<br>A7UFP8<br>G6CMA9<br>I1E4Y7<br>G6D354<br>S4PB07<br>S4PL34<br>O44308<br>D1LAB2<br>S4NTC3<br>H9J5Q7<br>G6CSN6<br>S4PTG2<br>D3X5F2<br>Q2LAR4           | 19 | <a href="http://www.kegg.jp/kegg-bin/show_pathway?ko03013+K12877+K03231+K03237+K03231+K03246+K03231+K13126+K03248+K12879+K14304+K14284+K03231+K03231+K03243+K14004+K05749+K03258+K03231+K03231">http://www.kegg.jp/kegg-bin/show_pathway?ko03013+K12877+K03231+K03237+K03231+K03246+K03231+K13126+K03248+K12879+K14304+K14284+K03231+K03231+K03243+K14004+K05749+K03258+K03231+K03231</a>               |
| ko05016 | Huntington's disease | Q86CZ0<br>I4DJ87<br>H9JV88<br>M9UVR1<br>G6DAS4<br>G6CKB9<br>I4DNY2<br>H9J1U7<br>H9ISH7<br>H9JBG4<br>M9TOT9<br>E9LFS8<br>I4DNC1<br>G6DL52<br>H9JA67<br>H9IUC3<br>H9IXM2                               | 17 | <a href="http://www.kegg.jp/kegg-bin/show_pathway?ko05016+K05863+K02134+K03948+K15040+K02135+K03957+K11826+K03006+K11644+K11351+K02126+K02256+K00413+K03008+K02128+K04498+K05863">http://www.kegg.jp/kegg-bin/show_pathway?ko05016+K05863+K02134+K03948+K15040+K02135+K03957+K11826+K03006+K11644+K11351+K02126+K02256+K00413+K03008+K02128+K04498+K05863</a>                                           |

|         |                              |                                                                                                                                |    |                                                                                                                                                                                                                                                                                                       |
|---------|------------------------------|--------------------------------------------------------------------------------------------------------------------------------|----|-------------------------------------------------------------------------------------------------------------------------------------------------------------------------------------------------------------------------------------------------------------------------------------------------------|
| ko05012 | Parkinson's disease          | Q86CZ0<br>I4DJ87<br>H9JV88<br>M9UVR1<br>G6DAS4<br>G6CKB9<br>I4DNK8<br>H9JBG4<br>M9TOT9<br>E9LFS8<br>I4DNC1<br>H9JA67<br>H9IXM2 | 13 | <a href="http://www.kegg.jp/kegg-bin/show_pathway?ko05012+K05863+K02134+K03948+K15040+K02135+K03957+K04555+K11351+K02126+K02256+K00413+K02128+K05863">http://www.kegg.jp/kegg-bin/show_pathway?ko05012+K05863+K02134+K03948+K15040+K02135+K03957+K04555+K11351+K02126+K02256+K00413+K02128+K05863</a> |
| ko05010 | Alzheimer's disease          | E3UJZ8<br>I4DJ87<br>H9JV88<br>G6DAS4<br>G6CKB9<br>S4NZV0<br>H9JBG4<br>M9TOT9<br>E9LFS8<br>I4DNC1<br>F8UEY1<br>H9JA67           | 12 | <a href="http://www.kegg.jp/kegg-bin/show_pathway?ko05010+K02183+K02134+K03948+K02135+K03957+K01408+K11351+K02126+K02256+K00413+K00134+K02128">http://www.kegg.jp/kegg-bin/show_pathway?ko05010+K02183+K02134+K03948+K02135+K03957+K01408+K11351+K02126+K02256+K00413+K00134+K02128</a>               |
| ko00190 | Oxidative phosphorylation    | G6CKL7<br>I4DJ87<br>H9JV88<br>G6DAS4<br>G6CKB9<br>H9JBG4<br>M9TOT9<br>E9LFS8<br>I4DNC1<br>E2IV54<br>G6CQI5<br>H9JA67           | 12 | <a href="http://www.kegg.jp/kegg-bin/show_pathway?ko00190+K02150+K02134+K03948+K02135+K03957+K11351+K02126+K02256+K00413+K02145+K02152+K02128">http://www.kegg.jp/kegg-bin/show_pathway?ko00190+K02150+K02134+K03948+K02135+K03957+K11351+K02126+K02256+K00413+K02145+K02152+K02128</a>               |
| ko00010 | Glycolysis / Gluconeogenesis | B3TEH3<br>G0T406<br>L7R6U6<br>D6BNT9<br>D2SNQ8<br>G6CIZ7<br>D2SNS6<br>H9JHI6<br>G6CJU9<br>G6DFF9<br>F8UEY1                     | 11 | <a href="http://www.kegg.jp/kegg-bin/show_pathway?ko00010+K01689+K00121+K01689+K01810+K00128+K01803+K00128+K00627+K00128+K15779+K00134">http://www.kegg.jp/kegg-bin/show_pathway?ko00010+K01689+K00121+K01689+K01810+K00128+K01803+K00128+K00627+K00128+K15779+K00134</a>                             |
| ko01230 | Biosynthesis of amino acids  | B3TEH3<br>I4DP84<br>L7R6U6<br>G6CIZ7<br>G6CTA2<br>S4PW23<br>Q1HQB5<br>F8UEY1<br>H9IUJ6<br>H9JBL2<br>G6CTV3                     | 11 | <a href="http://www.kegg.jp/kegg-bin/show_pathway?ko01230+K01689+K01647+K01689+K01803+K00600+K00600+K00789+K00134+K00616+K00031+K00030">http://www.kegg.jp/kegg-bin/show_pathway?ko01230+K01689+K01647+K01689+K01803+K00600+K00600+K00789+K00134+K00616+K00031+K00030</a>                             |

|         |                              |                                                                                                  |    |                                                                                                                                                                                                                                                             |
|---------|------------------------------|--------------------------------------------------------------------------------------------------|----|-------------------------------------------------------------------------------------------------------------------------------------------------------------------------------------------------------------------------------------------------------------|
| ko03040 | Spliceosome                  | G6DKM8<br>A9XZA5<br>H9JA60<br>H9JD02<br>G6D689<br>H9JR08<br>G6D354<br>Q1HPT3<br>S4NSX0<br>H9JB76 | 10 | <a href="http://www.kegg.jp/kegg-bin/show_pathway?ko03040+K12877+K12820+K12741+K12857+K11092+K12823+K12879+K12741+K12872+K09567">http://www.kegg.jp/kegg-bin/show_pathway?ko03040+K12877+K12820+K12741+K12857+K11092+K12823+K12879+K12741+K12872+K09567</a> |
| ko05134 | Legionellosis                | H9IZ19<br>B7SET3<br>H9CV61<br>A7UFP8<br>I4DIL8<br>O44308<br>D1LAB2<br>D3X5F2<br>Q2LAR4           | 9  | <a href="http://www.kegg.jp/kegg-bin/show_pathway?ko05134+K07953+K03231+K03231+K03231+K03233+K03231+K03231+K03231+K03231">http://www.kegg.jp/kegg-bin/show_pathway?ko05134+K07953+K03231+K03231+K03231+K03233+K03231+K03231+K03231+K03231</a>               |
| ko05166 | HTLV-I infection             | Q86CZ0<br>Q8MYA5<br>H9IT95<br>I4DMH6<br>M9UVR1<br>S4PEX9<br>H9IUC3<br>H9IXM2                     | 8  | <a href="http://www.kegg.jp/kegg-bin/show_pathway?ko05166+K05863+K04802+K08057+K08057+K15040+K02327+K04498+K05863">http://www.kegg.jp/kegg-bin/show_pathway?ko05166+K05863+K04802+K08057+K08057+K15040+K02327+K04498+K05863</a>                             |
| ko00020 | Citrate cycle (TCA cycle)    | I4DP84<br>H9J2S8<br>H9JHI6<br>S4NSU9<br>H9JFB9<br>H9JBL2<br>G6CTV3<br>S4P8U1                     | 8  | <a href="http://www.kegg.jp/kegg-bin/show_pathway?ko00020+K01647+K00658+K00627+K01900+K01679+K00031+K00030+K00658">http://www.kegg.jp/kegg-bin/show_pathway?ko00020+K01647+K00658+K00627+K01900+K01679+K00031+K00030+K00658</a>                             |
| ko05169 | Epstein-Barr virus infection | H9JCM2<br>G6DIQ9<br>D9N4J4<br>H9J1U7<br>H9JX71<br>G6DL52<br>G6D5P3<br>H9IUC3                     | 8  | <a href="http://www.kegg.jp/kegg-bin/show_pathway?ko05169+K03035+K15979+K15979+K03006+K03036+K03008+K06630+K04498">http://www.kegg.jp/kegg-bin/show_pathway?ko05169+K03035+K15979+K15979+K03006+K03036+K03008+K06630+K04498</a>                             |
| ko00071 | Fatty acid degradation       | G0T406<br>C9S271<br>H9J814<br>D2SNQ8<br>D2SNS6<br>G6CJU9<br>G6CYN2<br>G6CWA4                     | 8  | <a href="http://www.kegg.jp/kegg-bin/show_pathway?ko00071+K00121+K07511+K07511+K00128+K00128+K00128+K15013+K07515">http://www.kegg.jp/kegg-bin/show_pathway?ko00071+K00121+K07511+K07511+K00128+K00128+K00128+K15013+K07515</a>                             |
| ko00310 | Lysine degradation           | C9S271<br>H9J814<br>D2SNQ8<br>D2SNS6<br>H9J2S8<br>G6CJU9<br>G6CWA4<br>S4P8U1                     | 8  | <a href="http://www.kegg.jp/kegg-bin/show_pathway?ko00310+K07511+K07511+K00128+K00128+K00658+K00128+K07515+K00658">http://www.kegg.jp/kegg-bin/show_pathway?ko00310+K07511+K07511+K00128+K00128+K00658+K00128+K07515+K00658</a>                             |

|         |                                            |                                                                              |   |                                                                                                                                                                                                                                 |
|---------|--------------------------------------------|------------------------------------------------------------------------------|---|---------------------------------------------------------------------------------------------------------------------------------------------------------------------------------------------------------------------------------|
| ko05203 | Viral carcinogenesis                       | G6DIQ9<br>D9N4J4<br>H9JJE6<br>Q1HPQ3<br>G6D396<br>G6D5P3<br>G6DIF6<br>H9IUC3 | 8 | <a href="http://www.kegg.jp/kegg-bin/show_pathway?ko05203+K15979+K15979+K11254+K03123+K05768+K06630+K11254+K04498">http://www.kegg.jp/kegg-bin/show_pathway?ko05203+K15979+K15979+K11254+K03123+K05768+K06630+K11254+K04498</a> |
| ko05168 | Herpes simplex infection                   | Q8I6Y8<br>H9J1U7<br>R4ITA8<br>O77129<br>S4PL34<br>S4PG29<br>H9IUC3           | 7 | <a href="http://www.kegg.jp/kegg-bin/show_pathway?ko05168+K03237+K03006+K14840+K02633+K14284+K14840+K04498">http://www.kegg.jp/kegg-bin/show_pathway?ko05168+K03237+K03006+K14840+K02633+K14284+K14840+K04498</a>               |
| ko00040 | Pentose and glucuronate interconversions   | E1U7I5<br>D2SNQ8<br>U5KC00<br>D2SNS6<br>G6CJU9<br>G6D8L4<br>G9LPR1           | 7 | <a href="http://www.kegg.jp/kegg-bin/show_pathway?ko00040+K00963+K00128+K00011+K00128+K00128+K00008+K00699">http://www.kegg.jp/kegg-bin/show_pathway?ko00040+K00963+K00128+K00011+K00128+K00128+K00008+K00699</a>               |
| ko00230 | Purine metabolism                          | S4PCX5<br>H9J1U7<br>H9IT11<br>S4PEX9<br>G6DFP9<br>S4PD63<br>G6DL52           | 7 | <a href="http://www.kegg.jp/kegg-bin/show_pathway?ko00230+K10808+K03006+K01952+K02327+K15779+K01518+K03008">http://www.kegg.jp/kegg-bin/show_pathway?ko00230+K10808+K03006+K01952+K02327+K15779+K01518+K03008</a>               |
| ko00970 | Aminoacyl-tRNA biosynthesis                | G6DNL4<br>E9KGW9<br>EOD4V7<br>H9IX66<br>G6CVH5<br>G6DFX7<br>G6CNG9           | 7 | <a href="http://www.kegg.jp/kegg-bin/show_pathway?ko00970+K01875+K14163+K01890+K01868+K01876+K01870+K01883">http://www.kegg.jp/kegg-bin/show_pathway?ko00970+K01875+K14163+K01890+K01868+K01876+K01870+K01883</a>               |
| ko00280 | Valine, leucine and isoleucine degradation | C9S271<br>H9J814<br>D2SNQ8<br>D2SNS6<br>G6CJU9<br>G6CRM2<br>G6CWA4           | 7 | <a href="http://www.kegg.jp/kegg-bin/show_pathway?ko00280+K07511+K07511+K00128+K00128+K00128+K05607+K07515">http://www.kegg.jp/kegg-bin/show_pathway?ko00280+K07511+K07511+K00128+K00128+K00128+K05607+K07515</a>               |
| ko04144 | Endocytosis                                | I4DNY2<br>S4P5Y2<br>S4P8C3<br>S4P621<br>Q1HQ07<br>G6DG28<br>G6CIU6           | 7 | <a href="http://www.kegg.jp/kegg-bin/show_pathway?ko04144+K11826+K12471+K04707+K12200+K12199+K12486+K18442">http://www.kegg.jp/kegg-bin/show_pathway?ko04144+K11826+K12471+K04707+K12200+K12199+K12486+K18442</a>               |
| ko04022 | cGMP-PKG signaling pathway                 | E3UJZ8<br>Q86CZ0<br>M9UVR1<br>Q8T9W9<br>H9J971<br>H9IXM2                     | 6 | <a href="http://www.kegg.jp/kegg-bin/show_pathway?ko04022+K02183+K05863+K15040+K07376+K01540+K05863">http://www.kegg.jp/kegg-bin/show_pathway?ko04022+K02183+K05863+K15040+K07376+K01540+K05863</a>                             |

|         |                                             |                                                          |   |                                                                                                                                                                                                     |
|---------|---------------------------------------------|----------------------------------------------------------|---|-----------------------------------------------------------------------------------------------------------------------------------------------------------------------------------------------------|
| ko05034 | Alcoholism                                  | E3UJZ8<br>Q1HPV7<br>H9IZJ3<br>H9JJE6<br>H9JY79<br>G6DIF6 | 6 | <a href="http://www.kegg.jp/kegg-bin/show_pathway?ko05034+K02183+K11251+K06279+K11254+K11251+K11254">http://www.kegg.jp/kegg-bin/show_pathway?ko05034+K02183+K11251+K06279+K11254+K11251+K11254</a> |
| ko05200 | Pathways in cancer                          | Q3V6C6<br>S4P8C3<br>H9IY28<br>H9JFB9<br>H9U396<br>H9IUC3 | 6 | <a href="http://www.kegg.jp/kegg-bin/show_pathway?ko05200+K04079+K04707+K03870+K01679+K09487+K04498">http://www.kegg.jp/kegg-bin/show_pathway?ko05200+K04079+K04707+K03870+K01679+K09487+K04498</a> |
| ko04932 | Non-alcoholic fatty liver disease (NAFLD)   | Q8I6Y8<br>H9JV88<br>G6CKB9<br>H9JBG4<br>E9LFS8<br>I4DNC1 | 6 | <a href="http://www.kegg.jp/kegg-bin/show_pathway?ko04932+K03237+K03948+K03957+K11351+K02256+K00413">http://www.kegg.jp/kegg-bin/show_pathway?ko04932+K03237+K03948+K03957+K11351+K02256+K00413</a> |
| ko00520 | Amino sugar and nucleotide sugar metabolism | E1U7I5<br>D6BNT9<br>S4PN79<br>I4DNI3<br>H9JFY6<br>G6DFF9 | 6 | <a href="http://www.kegg.jp/kegg-bin/show_pathway?ko00520+K00963+K01810+K01784+K00621+K01711+K15779">http://www.kegg.jp/kegg-bin/show_pathway?ko00520+K00963+K01810+K01784+K00621+K01711+K15779</a> |
| ko00240 | Pyrimidine metabolism                       | S4PCX5<br>G6D3R7<br>H9J1U7<br>S4PEX9<br>S4PD63<br>G6DL52 | 6 | <a href="http://www.kegg.jp/kegg-bin/show_pathway?ko00240+K10808+K13800+K03006+K02327+K01518+K03008">http://www.kegg.jp/kegg-bin/show_pathway?ko00240+K10808+K13800+K03006+K02327+K01518+K03008</a> |
| ko00380 | Tryptophan metabolism                       | C9S271<br>H9J814<br>D2SNQ8<br>D2SNS6<br>G6CJU9<br>G6CWA4 | 6 | <a href="http://www.kegg.jp/kegg-bin/show_pathway?ko00380+K07511+K07511+K00128+K00128+K00128+K07515">http://www.kegg.jp/kegg-bin/show_pathway?ko00380+K07511+K07511+K00128+K00128+K00128+K07515</a> |
| ko00410 | beta-Alanine metabolism                     | C9S271<br>H9J814<br>D2SNQ8<br>D2SNS6<br>G6CJU9<br>G6CWA4 | 6 | <a href="http://www.kegg.jp/kegg-bin/show_pathway?ko00410+K07511+K07511+K00128+K00128+K00128+K07515">http://www.kegg.jp/kegg-bin/show_pathway?ko00410+K07511+K07511+K00128+K00128+K00128+K07515</a> |
| ko00620 | Pyruvate metabolism                         | D2SNQ8<br>D2SNS6<br>H9JHI6<br>G6CJU9<br>H9JFB9<br>G6CY74 | 6 | <a href="http://www.kegg.jp/kegg-bin/show_pathway?ko00620+K00128+K00128+K00627+K00128+K01679+K00029">http://www.kegg.jp/kegg-bin/show_pathway?ko00620+K00128+K00128+K00627+K00128+K01679+K00029</a> |
| ko00330 | Arginine and proline metabolism             | E9NZS5<br>D2SNQ8<br>D2SNS6<br>G6CJU9<br>Q53EK0           | 5 | <a href="http://www.kegg.jp/kegg-bin/show_pathway?ko00330+K00933+K00128+K00128+K00128+K00472">http://www.kegg.jp/kegg-bin/show_pathway?ko00330+K00933+K00128+K00128+K00128+K00472</a>               |
| ko00680 | Methane metabolism                          | B3TEH3<br>G0T406<br>L7R6U6<br>G6CTA2<br>S4PW23           | 5 | <a href="http://www.kegg.jp/kegg-bin/show_pathway?ko00680+K01689+K00121+K01689+K00600+K00600">http://www.kegg.jp/kegg-bin/show_pathway?ko00680+K01689+K00121+K01689+K00600+K00600</a>               |

|         |                                     |                                                |   |                                                                                                                                                                                       |
|---------|-------------------------------------|------------------------------------------------|---|---------------------------------------------------------------------------------------------------------------------------------------------------------------------------------------|
| ko03018 | RNA degradation                     | B3TEH3<br>G6CMA9<br>H9JMC0<br>L7R6U6<br>G6D1T2 | 5 | <a href="http://www.kegg.jp/kegg-bin/show_pathway?ko03018+K01689+K13126+K12614+K01689+K04043">http://www.kegg.jp/kegg-bin/show_pathway?ko03018+K01689+K13126+K12614+K01689+K04043</a> |
| ko04066 | HIF-1 signaling pathway             | B3TEH3<br>L7R6U6<br>H9IY28<br>F8UEY1<br>H9IUC3 | 5 | <a href="http://www.kegg.jp/kegg-bin/show_pathway?ko04066+K01689+K01689+K03870+K00134+K04498">http://www.kegg.jp/kegg-bin/show_pathway?ko04066+K01689+K01689+K03870+K00134+K04498</a> |
| ko04626 | Plant-pathogen interaction          | E3UJZ8<br>Q3V6C6<br>S4PEA4<br>H9ITJ2<br>H9U396 | 5 | <a href="http://www.kegg.jp/kegg-bin/show_pathway?ko04626+K02183+K04079+K12795+K00864+K09487">http://www.kegg.jp/kegg-bin/show_pathway?ko04626+K02183+K04079+K12795+K00864+K09487</a> |
| ko04151 | PI3K-Akt signaling pathway          | Q3V6C6<br>G6CKL9<br>S4PTG2<br>G6D5P3<br>H9U396 | 5 | <a href="http://www.kegg.jp/kegg-bin/show_pathway?ko04151+K04079+K09554+K03258+K06630+K09487">http://www.kegg.jp/kegg-bin/show_pathway?ko04151+K04079+K09554+K03258+K06630+K09487</a> |
| ko04612 | Antigen processing and presentation | Q3V6C6<br>H9IT95<br>I4DMH6<br>S4PKX7<br>G6CPN3 | 5 | <a href="http://www.kegg.jp/kegg-bin/show_pathway?ko04612+K04079+K08057+K08057+K08056+K08056">http://www.kegg.jp/kegg-bin/show_pathway?ko04612+K04079+K08057+K08057+K08056+K08056</a> |
| ko04145 | Phagosome                           | G6CKL7<br>H9IT95<br>I4DMH6<br>E2IV54<br>G6CQI5 | 5 | <a href="http://www.kegg.jp/kegg-bin/show_pathway?ko04145+K02150+K08057+K08057+K02145+K02152">http://www.kegg.jp/kegg-bin/show_pathway?ko04145+K02150+K08057+K08057+K02145+K02152</a> |
| ko04721 | Synaptic vesicle cycle              | G6CKL7<br>I4DNY2<br>H9JAP5<br>E2IV54<br>G6CQI5 | 5 | <a href="http://www.kegg.jp/kegg-bin/show_pathway?ko04721+K02150+K11826+K04560+K02145+K02152">http://www.kegg.jp/kegg-bin/show_pathway?ko04721+K02150+K11826+K04560+K02145+K02152</a> |
| ko03050 | Proteasome                          | H9J1E8<br>H9JCM2<br>B6VAH6<br>H9JX71<br>H9J567 | 5 | <a href="http://www.kegg.jp/kegg-bin/show_pathway?ko03050+K02738+K03035+K02737+K03036+K02730">http://www.kegg.jp/kegg-bin/show_pathway?ko03050+K02738+K03035+K02737+K03036+K02730</a> |
| ko04120 | Ubiquitin mediated proteolysis      | H9JEB5<br>I4DNK8<br>S4P8C3<br>H9IY28<br>G6D3G4 | 5 | <a href="http://www.kegg.jp/kegg-bin/show_pathway?ko04120+K10579+K04555+K04707+K03870+K10596">http://www.kegg.jp/kegg-bin/show_pathway?ko04120+K10579+K04555+K04707+K03870+K10596</a> |
| ko00561 | Glycerolipid metabolism             | D2SNQ8<br>U5KC00<br>D2SNS6<br>G6CJU9<br>H9ITJ2 | 5 | <a href="http://www.kegg.jp/kegg-bin/show_pathway?ko00561+K00128+K00011+K00128+K00128+K00864">http://www.kegg.jp/kegg-bin/show_pathway?ko00561+K00128+K00011+K00128+K00128+K00864</a> |
| ko03008 | Ribosome biogenesis in eukaryotes   | G6DLM7<br>S4PL34<br>G6DB46<br>S4NXV8<br>G6CRF5 | 5 | <a href="http://www.kegg.jp/kegg-bin/show_pathway?ko03008+K11131+K14284+K14572+K14538+K14556">http://www.kegg.jp/kegg-bin/show_pathway?ko03008+K11131+K14284+K14572+K14538+K14556</a> |
| ko04810 | Regulation of actin cytoskeleton    | K9J9U2<br>G6CSN6<br>G6D396<br>H9J2G3           | 4 | <a href="http://www.kegg.jp/kegg-bin/show_pathway?ko04810+K05765+K05749+K05768+K05767">http://www.kegg.jp/kegg-bin/show_pathway?ko04810+K05765+K05749+K05768+K05767</a>               |

|         |                                           |                                      |   |                                                                                                                                                                         |
|---------|-------------------------------------------|--------------------------------------|---|-------------------------------------------------------------------------------------------------------------------------------------------------------------------------|
| ko03015 | mRNA surveillance pathway                 | G6DKM8<br>G6CMA9<br>S4PL34<br>H9JFV2 | 4 | <a href="http://www.kegg.jp/kegg-bin/show_pathway?ko03015+K12877+K13126+K14284+K06100">http://www.kegg.jp/kegg-bin/show_pathway?ko03015+K12877+K13126+K14284+K06100</a> |
| ko04020 | Calcium signaling pathway                 | E3UJZ8<br>Q86CZ0<br>M9UVR1<br>H9IXM2 | 4 | <a href="http://www.kegg.jp/kegg-bin/show_pathway?ko04020+K02183+K05863+K15040+K05863">http://www.kegg.jp/kegg-bin/show_pathway?ko04020+K02183+K05863+K15040+K05863</a> |
| ko04915 | Estrogen signaling pathway                | E3UJZ8<br>Q3V6C6<br>H9IZJ3<br>H9U396 | 4 | <a href="http://www.kegg.jp/kegg-bin/show_pathway?ko04915+K02183+K04079+K06279+K09487">http://www.kegg.jp/kegg-bin/show_pathway?ko04915+K02183+K04079+K06279+K09487</a> |
| ko03030 | DNA replication                           | Q8MYA5<br>S4PEX9<br>S4PXM6<br>H9JPK6 | 4 | <a href="http://www.kegg.jp/kegg-bin/show_pathway?ko03030+K04802+K02327+K02542+K10756">http://www.kegg.jp/kegg-bin/show_pathway?ko03030+K04802+K02327+K02542+K10756</a> |
| ko03420 | Nucleotide excision repair                | Q8MYA5<br>I4DMW4<br>S4PEX9<br>H9JPK6 | 4 | <a href="http://www.kegg.jp/kegg-bin/show_pathway?ko03420+K04802+K10839+K02327+K10756">http://www.kegg.jp/kegg-bin/show_pathway?ko03420+K04802+K10839+K02327+K10756</a> |
| ko04110 | Cell cycle                                | Q8MYA5<br>S4PXM6<br>G6D5P3<br>H9IUC3 | 4 | <a href="http://www.kegg.jp/kegg-bin/show_pathway?ko04110+K04802+K02542+K06630+K04498">http://www.kegg.jp/kegg-bin/show_pathway?ko04110+K04802+K02542+K06630+K04498</a> |
| ko05322 | Systemic lupus erythematosus              | Q1HPV7<br>H9JJE6<br>H9JY79<br>G6DIF6 | 4 | <a href="http://www.kegg.jp/kegg-bin/show_pathway?ko05322+K11251+K11254+K11251+K11254">http://www.kegg.jp/kegg-bin/show_pathway?ko05322+K11251+K11254+K11251+K11254</a> |
| ko00052 | Galactose metabolism                      | E1U7I5<br>U5KC00<br>S4PN79<br>G6DF9  | 4 | <a href="http://www.kegg.jp/kegg-bin/show_pathway?ko00052+K00963+K00011+K01784+K15779">http://www.kegg.jp/kegg-bin/show_pathway?ko00052+K00963+K00011+K01784+K15779</a> |
| ko00500 | Starch and sucrose metabolism             | E1U7I5<br>D6BNT9<br>G6DF9<br>G9LPR1  | 4 | <a href="http://www.kegg.jp/kegg-bin/show_pathway?ko00500+K00963+K01810+K15779+K00699">http://www.kegg.jp/kegg-bin/show_pathway?ko00500+K00963+K01810+K15779+K00699</a> |
| ko05110 | Vibrio cholerae infection                 | G6CKL7<br>G6CTH9<br>E2IV54<br>G6CQI5 | 4 | <a href="http://www.kegg.jp/kegg-bin/show_pathway?ko05110+K02150+K10949+K02145+K02152">http://www.kegg.jp/kegg-bin/show_pathway?ko05110+K02150+K10949+K02145+K02152</a> |
| ko00625 | Chloroalkane and chloroalkene degradation | G0T406<br>D2SNQ8<br>D2SNS6<br>G6CJU9 | 4 | <a href="http://www.kegg.jp/kegg-bin/show_pathway?ko00625+K00121+K00128+K00128+K00128">http://www.kegg.jp/kegg-bin/show_pathway?ko00625+K00121+K00128+K00128+K00128</a> |
| ko00640 | Propanoate metabolism                     | C9S271<br>H9J814<br>S4NSU9<br>G6CWA4 | 4 | <a href="http://www.kegg.jp/kegg-bin/show_pathway?ko00640+K07511+K07511+K01900+K07515">http://www.kegg.jp/kegg-bin/show_pathway?ko00640+K07511+K07511+K01900+K07515</a> |
| ko01212 | Fatty acid metabolism                     | C9S271<br>H9J814<br>G6CYN2<br>G6CWA4 | 4 | <a href="http://www.kegg.jp/kegg-bin/show_pathway?ko01212+K07511+K07511+K15013+K07515">http://www.kegg.jp/kegg-bin/show_pathway?ko01212+K07511+K07511+K15013+K07515</a> |
| ko00053 | Ascorbate and aldarate metabolism         | D2SNQ8<br>D2SNS6<br>G6CJU9<br>G9LPR1 | 4 | <a href="http://www.kegg.jp/kegg-bin/show_pathway?ko00053+K00128+K00128+K00128+K00128">http://www.kegg.jp/kegg-bin/show_pathway?ko00053+K00128+K00128+K00128+K00128</a> |



|         |                                                            |                                      |   |                                                                                                                                                                         |
|---------|------------------------------------------------------------|--------------------------------------|---|-------------------------------------------------------------------------------------------------------------------------------------------------------------------------|
| ko00051 | Fructose and mannose metabolism                            | U5KC00<br>G6CIZ7<br>H9JFY6<br>G6D8L4 | 4 | <a href="http://www.kegg.jp/kegg-bin/show_pathway?ko00051+K00011+K01803+K01711+K00008">http://www.kegg.jp/kegg-bin/show_pathway?ko00051+K00011+K01803+K01711+K00008</a> |
| ko05205 | Proteoglycans in cancer                                    | H9JR08<br>S4P8C3<br>G6CIX7<br>S4PTG2 | 4 | <a href="http://www.kegg.jp/kegg-bin/show_pathway?ko05205+K12823+K04707+K10380+K03258">http://www.kegg.jp/kegg-bin/show_pathway?ko05205+K12823+K04707+K10380+K03258</a> |
| ko04024 | cAMP signaling pathway                                     | E3UJZ8<br>H9J971<br>H9IUC3           | 3 | <a href="http://www.kegg.jp/kegg-bin/show_pathway?ko04024+K02183+K01540+K04498">http://www.kegg.jp/kegg-bin/show_pathway?ko04024+K02183+K01540+K04498</a>               |
| ko04713 | Circadian entrainment                                      | E3UJZ8<br>Q8T9W9<br>O77129           | 3 | <a href="http://www.kegg.jp/kegg-bin/show_pathway?ko04713+K02183+K07376+K02633">http://www.kegg.jp/kegg-bin/show_pathway?ko04713+K02183+K07376+K02633</a>               |
| ko04722 | Neurotrophin signaling pathway                             | E3UJZ8<br>H9IZJ3<br>G6D5P3           | 3 | <a href="http://www.kegg.jp/kegg-bin/show_pathway?ko04722+K02183+K06279+K06630">http://www.kegg.jp/kegg-bin/show_pathway?ko04722+K02183+K06279+K06630</a>               |
| ko04910 | Insulin signaling pathway                                  | E3UJZ8<br>H9IZJ3<br>S4P8C3           | 3 | <a href="http://www.kegg.jp/kegg-bin/show_pathway?ko04910+K02183+K06279+K04707">http://www.kegg.jp/kegg-bin/show_pathway?ko04910+K02183+K06279+K04707</a>               |
| ko04970 | Salivary secretion                                         | E3UJZ8<br>Q8T9W9<br>H9J971           | 3 | <a href="http://www.kegg.jp/kegg-bin/show_pathway?ko04970+K02183+K07376+K01540">http://www.kegg.jp/kegg-bin/show_pathway?ko04970+K02183+K07376+K01540</a>               |
| ko05152 | Tuberculosis                                               | E3UJZ8<br>G6D1T2<br>H9IUC3           | 3 | <a href="http://www.kegg.jp/kegg-bin/show_pathway?ko05152+K02183+K04043+K04498">http://www.kegg.jp/kegg-bin/show_pathway?ko05152+K02183+K04043+K04498</a>               |
| ko04621 | NOD-like receptor signaling pathway                        | Q3V6C6<br>S4PEA4<br>H9U396           | 3 | <a href="http://www.kegg.jp/kegg-bin/show_pathway?ko04621+K04079+K12795+K09487">http://www.kegg.jp/kegg-bin/show_pathway?ko04621+K04079+K12795+K09487</a>               |
| ko05215 | Prostate cancer                                            | Q3V6C6<br>H9U396<br>H9IUC3           | 3 | <a href="http://www.kegg.jp/kegg-bin/show_pathway?ko05215+K04079+K09487+K04498">http://www.kegg.jp/kegg-bin/show_pathway?ko05215+K04079+K09487+K04498</a>               |
| ko05164 | Influenza A                                                | Q8I6Y8<br>S4PL34<br>H9IUC3           | 3 | <a href="http://www.kegg.jp/kegg-bin/show_pathway?ko05164+K03237+K14284+K04498">http://www.kegg.jp/kegg-bin/show_pathway?ko05164+K03237+K14284+K04498</a>               |
| ko03430 | Mismatch repair                                            | Q8MYA5<br>S4PEX9<br>H9JPK6           | 3 | <a href="http://www.kegg.jp/kegg-bin/show_pathway?ko03430+K04802+K02327+K10756">http://www.kegg.jp/kegg-bin/show_pathway?ko03430+K04802+K02327+K10756</a>               |
| ko00480 | Glutathione metabolism                                     | S4PCX5<br>Q308N8<br>H9JBL2           | 3 | <a href="http://www.kegg.jp/kegg-bin/show_pathway?ko00480+K10808+K00799+K00031">http://www.kegg.jp/kegg-bin/show_pathway?ko00480+K10808+K00799+K00031</a>               |
| ko04966 | Collecting duct acid secretion                             | G6CKL7<br>E2IV54<br>G6CQI5           | 3 | <a href="http://www.kegg.jp/kegg-bin/show_pathway?ko04966+K02150+K02145+K02152">http://www.kegg.jp/kegg-bin/show_pathway?ko04966+K02150+K02145+K02152</a>               |
| ko05120 | Epithelial cell signaling in Helicobacter pylori infection | G6CKL7<br>E2IV54<br>G6CQI5           | 3 | <a href="http://www.kegg.jp/kegg-bin/show_pathway?ko05120+K02150+K02145+K02152">http://www.kegg.jp/kegg-bin/show_pathway?ko05120+K02150+K02145+K02152</a>               |
| ko05323 | Rheumatoid arthritis                                       | G6CKL7<br>E2IV54<br>G6CQI5           | 3 | <a href="http://www.kegg.jp/kegg-bin/show_pathway?ko05323+K02150+K02145+K02152">http://www.kegg.jp/kegg-bin/show_pathway?ko05323+K02150+K02145+K02152</a>               |

|         |                                              |                            |   |                                                                                                                                                           |
|---------|----------------------------------------------|----------------------------|---|-----------------------------------------------------------------------------------------------------------------------------------------------------------|
| ko00630 | Glyoxylate and dicarboxylate metabolism      | I4DP84<br>G6CTA2<br>S4PW23 | 3 | <a href="http://www.kegg.jp/kegg-bin/show_pathway?ko00630+K01647+K00600+K00600">http://www.kegg.jp/kegg-bin/show_pathway?ko00630+K01647+K00600+K00600</a> |
| ko01210 | 2-Oxocarboxylic acid metabolism              | I4DP84<br>H9JBL2<br>G6CTV3 | 3 | <a href="http://www.kegg.jp/kegg-bin/show_pathway?ko01210+K01647+K00031+K00030">http://www.kegg.jp/kegg-bin/show_pathway?ko01210+K01647+K00031+K00030</a> |
| ko00830 | Retinol metabolism                           | G0T406<br>H9JQH9<br>G9LPR1 | 3 | <a href="http://www.kegg.jp/kegg-bin/show_pathway?ko00830+K00121+K11147+K00699">http://www.kegg.jp/kegg-bin/show_pathway?ko00830+K00121+K11147+K00699</a> |
| ko00980 | Metabolism of xenobiotics by cytochrome P450 | G0T406<br>Q308N8<br>G9LPR1 | 3 | <a href="http://www.kegg.jp/kegg-bin/show_pathway?ko00980+K00121+K00799+K00699">http://www.kegg.jp/kegg-bin/show_pathway?ko00980+K00121+K00799+K00699</a> |
| ko00982 | Drug metabolism - cytochrome P450            | G0T406<br>Q308N8<br>G9LPR1 | 3 | <a href="http://www.kegg.jp/kegg-bin/show_pathway?ko00982+K00121+K00799+K00699">http://www.kegg.jp/kegg-bin/show_pathway?ko00982+K00121+K00799+K00699</a> |
| ko05204 | Chemical carcinogenesis                      | G0T406<br>Q308N8<br>G9LPR1 | 3 | <a href="http://www.kegg.jp/kegg-bin/show_pathway?ko05204+K00121+K00799+K00699">http://www.kegg.jp/kegg-bin/show_pathway?ko05204+K00121+K00799+K00699</a> |
| ko00062 | Fatty acid elongation                        | C9S271<br>H9J814<br>G6CWA4 | 3 | <a href="http://www.kegg.jp/kegg-bin/show_pathway?ko00062+K07511+K07511+K07515">http://www.kegg.jp/kegg-bin/show_pathway?ko00062+K07511+K07511+K07515</a> |
| ko00362 | Benzoate degradation                         | C9S271<br>H9J814<br>G6CWA4 | 3 | <a href="http://www.kegg.jp/kegg-bin/show_pathway?ko00362+K07511+K07511+K07515">http://www.kegg.jp/kegg-bin/show_pathway?ko00362+K07511+K07511+K07515</a> |
| ko00627 | Aminobenzoate degradation                    | C9S271<br>H9J814<br>G6CWA4 | 3 | <a href="http://www.kegg.jp/kegg-bin/show_pathway?ko00627+K07511+K07511+K07515">http://www.kegg.jp/kegg-bin/show_pathway?ko00627+K07511+K07511+K07515</a> |
| ko00650 | Butanoate metabolism                         | C9S271<br>H9J814<br>G6CWA4 | 3 | <a href="http://www.kegg.jp/kegg-bin/show_pathway?ko00650+K07511+K07511+K07515">http://www.kegg.jp/kegg-bin/show_pathway?ko00650+K07511+K07511+K07515</a> |
| ko00930 | Caprolactam degradation                      | C9S271<br>H9J814<br>G6CWA4 | 3 | <a href="http://www.kegg.jp/kegg-bin/show_pathway?ko00930+K07511+K07511+K07515">http://www.kegg.jp/kegg-bin/show_pathway?ko00930+K07511+K07511+K07515</a> |
| ko00030 | Pentose phosphate pathway                    | D6BNT9<br>G6DFF9<br>H9IUJ6 | 3 | <a href="http://www.kegg.jp/kegg-bin/show_pathway?ko00030+K01810+K15779+K00616">http://www.kegg.jp/kegg-bin/show_pathway?ko00030+K01810+K15779+K00616</a> |
| ko00340 | Histidine metabolism                         | D2SNQ8<br>D2SNS6<br>G6CJU9 | 3 | <a href="http://www.kegg.jp/kegg-bin/show_pathway?ko00340+K00128+K00128+K00128">http://www.kegg.jp/kegg-bin/show_pathway?ko00340+K00128+K00128+K00128</a> |
| ko00903 | Limonene and pinene degradation              | D2SNQ8<br>D2SNS6<br>G6CJU9 | 3 | <a href="http://www.kegg.jp/kegg-bin/show_pathway?ko00903+K00128+K00128+K00128">http://www.kegg.jp/kegg-bin/show_pathway?ko00903+K00128+K00128+K00128</a> |
| ko00710 | Carbon fixation in photosynthetic organisms  | G6CIZ7<br>F8UEY1<br>G6CY74 | 3 | <a href="http://www.kegg.jp/kegg-bin/show_pathway?ko00710+K01803+K00134+K00029">http://www.kegg.jp/kegg-bin/show_pathway?ko00710+K01803+K00134+K00029</a> |
| ko00260 | Glycine, serine and threonine metabolism     | G6CTA2<br>S4PW23<br>S4PS76 | 3 | <a href="http://www.kegg.jp/kegg-bin/show_pathway?ko00260+K00600+K00600+K00552">http://www.kegg.jp/kegg-bin/show_pathway?ko00260+K00600+K00600+K00552</a> |

|         |                                        |                            |   |                                                                                                                                                           |
|---------|----------------------------------------|----------------------------|---|-----------------------------------------------------------------------------------------------------------------------------------------------------------|
| ko05206 | MicroRNAs in cancer                    | H9IZJ3<br>V9VJY3<br>H9IUC3 | 3 | <a href="http://www.kegg.jp/kegg-bin/show_pathway?ko05206+K06279+K11592+K04498">http://www.kegg.jp/kegg-bin/show_pathway?ko05206+K06279+K11592+K04498</a> |
| ko04919 | Thyroid hormone signaling pathway      | H9ISH7<br>H9J971<br>H9IUC3 | 3 | <a href="http://www.kegg.jp/kegg-bin/show_pathway?ko04919+K11644+K01540+K04498">http://www.kegg.jp/kegg-bin/show_pathway?ko04919+K11644+K01540+K04498</a> |
| ko03022 | Basal transcription factors            | I4DNR5<br>Q1HPQ3<br>Q1HPY2 | 3 | <a href="http://www.kegg.jp/kegg-bin/show_pathway?ko03022+K03139+K03123+K03126">http://www.kegg.jp/kegg-bin/show_pathway?ko03022+K03139+K03123+K03126</a> |
| ko05211 | Renal cell carcinoma                   | H9IY28<br>H9JFB9<br>H9IUC3 | 3 | <a href="http://www.kegg.jp/kegg-bin/show_pathway?ko05211+K03870+K01679+K04498">http://www.kegg.jp/kegg-bin/show_pathway?ko05211+K03870+K01679+K04498</a> |
| ko04260 | Cardiac muscle contraction             | E9LFS8<br>I4DNC1<br>H9J971 | 3 | <a href="http://www.kegg.jp/kegg-bin/show_pathway?ko04260+K02256+K00413+K01540">http://www.kegg.jp/kegg-bin/show_pathway?ko04260+K02256+K00413+K01540</a> |
| ko00510 | N-Glycan biosynthesis                  | H9J5V8<br>G6DQ02<br>S4PEG4 | 3 | <a href="http://www.kegg.jp/kegg-bin/show_pathway?ko00510+K07151+K12668+K03843">http://www.kegg.jp/kegg-bin/show_pathway?ko00510+K07151+K12668+K03843</a> |
| ko00513 | Various types of N-glycan biosynthesis | H9J5V8<br>G6DQ02<br>S4PEG4 | 3 | <a href="http://www.kegg.jp/kegg-bin/show_pathway?ko00513+K07151+K12668+K03843">http://www.kegg.jp/kegg-bin/show_pathway?ko00513+K07151+K12668+K03843</a> |
| ko04666 | Fc gamma R-mediated phagocytosis       | K9J9U2<br>G6D396           | 2 | <a href="http://www.kegg.jp/kegg-bin/show_pathway?ko04666+K05765+K05768">http://www.kegg.jp/kegg-bin/show_pathway?ko04666+K05765+K05768</a>               |
| ko05133 | Pertussis                              | K9J9U2<br>E3UJZ8           | 2 | <a href="http://www.kegg.jp/kegg-bin/show_pathway?ko05133+K05765+K02183">http://www.kegg.jp/kegg-bin/show_pathway?ko05133+K05765+K02183</a>               |
| ko04014 | Ras signaling pathway                  | E3UJZ8<br>H9IZJ3           | 2 | <a href="http://www.kegg.jp/kegg-bin/show_pathway?ko04014+K02183+K06279">http://www.kegg.jp/kegg-bin/show_pathway?ko04014+K02183+K06279</a>               |
| ko04114 | Oocyte meiosis                         | E3UJZ8<br>G6D5P3           | 2 | <a href="http://www.kegg.jp/kegg-bin/show_pathway?ko04114+K02183+K06630">http://www.kegg.jp/kegg-bin/show_pathway?ko04114+K02183+K06630</a>               |
| ko04261 | Adrenergic signaling in cardiomyocytes | E3UJZ8<br>H9J971           | 2 | <a href="http://www.kegg.jp/kegg-bin/show_pathway?ko04261+K02183+K01540">http://www.kegg.jp/kegg-bin/show_pathway?ko04261+K02183+K01540</a>               |
| ko04720 | Long-term potentiation                 | E3UJZ8<br>H9IUC3           | 2 | <a href="http://www.kegg.jp/kegg-bin/show_pathway?ko04720+K02183+K04498">http://www.kegg.jp/kegg-bin/show_pathway?ko04720+K02183+K04498</a>               |
| ko04740 | Olfactory transduction                 | E3UJZ8<br>Q8T9W9           | 2 | <a href="http://www.kegg.jp/kegg-bin/show_pathway?ko04740+K02183+K07376">http://www.kegg.jp/kegg-bin/show_pathway?ko04740+K02183+K07376</a>               |
| ko04916 | Melanogenesis                          | E3UJZ8<br>H9IUC3           | 2 | <a href="http://www.kegg.jp/kegg-bin/show_pathway?ko04916+K02183+K04498">http://www.kegg.jp/kegg-bin/show_pathway?ko04916+K02183+K04498</a>               |
| ko04971 | Gastric acid secretion                 | E3UJZ8<br>H9J971           | 2 | <a href="http://www.kegg.jp/kegg-bin/show_pathway?ko04971+K02183+K01540">http://www.kegg.jp/kegg-bin/show_pathway?ko04971+K02183+K01540</a>               |
| ko05031 | Amphetamine addiction                  | E3UJZ8<br>H9JAP5           | 2 | <a href="http://www.kegg.jp/kegg-bin/show_pathway?ko05031+K02183+K04560">http://www.kegg.jp/kegg-bin/show_pathway?ko05031+K02183+K04560</a>               |
| ko05214 | Glioma                                 | E3UJZ8<br>H9IZJ3           | 2 | <a href="http://www.kegg.jp/kegg-bin/show_pathway?ko05214+K02183+K06279">http://www.kegg.jp/kegg-bin/show_pathway?ko05214+K02183+K06279</a>               |
| ko03410 | Base excision repair                   | Q8MYA5<br>S4PEX9           | 2 | <a href="http://www.kegg.jp/kegg-bin/show_pathway?ko03410+K04802+K02327">http://www.kegg.jp/kegg-bin/show_pathway?ko03410+K04802+K02327</a>               |

|         |                                                           |                  |   |                                                                                                                                             |
|---------|-----------------------------------------------------------|------------------|---|---------------------------------------------------------------------------------------------------------------------------------------------|
| ko05161 | Hepatitis B                                               | Q8MYA5<br>H9IUC3 | 2 | <a href="http://www.kegg.jp/kegg-bin/show_pathway?ko05161+K04802+K04498">http://www.kegg.jp/kegg-bin/show_pathway?ko05161+K04802+K04498</a> |
| ko00770 | Pantothenate and CoA biosynthesis                         | S4PGL2<br>H9J9Q9 | 2 | <a href="http://www.kegg.jp/kegg-bin/show_pathway?ko00770+K01922+K09680">http://www.kegg.jp/kegg-bin/show_pathway?ko00770+K01922+K09680</a> |
| ko05142 | Chagas disease (American trypanosomiasis)                 | H9IT95<br>I4DMH6 | 2 | <a href="http://www.kegg.jp/kegg-bin/show_pathway?ko05142+K08057+K08057">http://www.kegg.jp/kegg-bin/show_pathway?ko05142+K08057+K08057</a> |
| ko04530 | Tight junction                                            | E3UKL7<br>H9JFV2 | 2 | <a href="http://www.kegg.jp/kegg-bin/show_pathway?ko04530+K10352+K06100">http://www.kegg.jp/kegg-bin/show_pathway?ko04530+K10352+K06100</a> |
| ko00860 | Porphyrin and chlorophyll metabolism                      | E9KGW9<br>G9LPR1 | 2 | <a href="http://www.kegg.jp/kegg-bin/show_pathway?ko00860+K14163+K00699">http://www.kegg.jp/kegg-bin/show_pathway?ko00860+K14163+K00699</a> |
| ko04961 | Endocrine and other factor-regulated calcium reabsorption | I4DNY2<br>H9J971 | 2 | <a href="http://www.kegg.jp/kegg-bin/show_pathway?ko04961+K11826+K01540">http://www.kegg.jp/kegg-bin/show_pathway?ko04961+K11826+K01540</a> |
| ko00460 | Cyanoamino acid metabolism                                | G6CTA2<br>S4PW23 | 2 | <a href="http://www.kegg.jp/kegg-bin/show_pathway?ko00460+K00600+K00600">http://www.kegg.jp/kegg-bin/show_pathway?ko00460+K00600+K00600</a> |
| ko00670 | One carbon pool by folate                                 | G6CTA2<br>S4PW23 | 2 | <a href="http://www.kegg.jp/kegg-bin/show_pathway?ko00670+K00600+K00600">http://www.kegg.jp/kegg-bin/show_pathway?ko00670+K00600+K00600</a> |
| ko00760 | Nicotinate and nicotinamide metabolism                    | H9IV80<br>S4PE88 | 2 | <a href="http://www.kegg.jp/kegg-bin/show_pathway?ko00760+K01950+K00763">http://www.kegg.jp/kegg-bin/show_pathway?ko00760+K01950+K00763</a> |
| ko04911 | Insulin secretion                                         | H9JAP5<br>H9J971 | 2 | <a href="http://www.kegg.jp/kegg-bin/show_pathway?ko04911+K04560+K01540">http://www.kegg.jp/kegg-bin/show_pathway?ko04911+K04560+K01540</a> |
| ko04012 | ErbB signaling pathway                                    | H9IZJ3<br>S4P8C3 | 2 | <a href="http://www.kegg.jp/kegg-bin/show_pathway?ko04012+K06279+K04707">http://www.kegg.jp/kegg-bin/show_pathway?ko04012+K06279+K04707</a> |
| ko05100 | Bacterial invasion of epithelial cells                    | H9IZJ3<br>S4P8C3 | 2 | <a href="http://www.kegg.jp/kegg-bin/show_pathway?ko05100+K06279+K04707">http://www.kegg.jp/kegg-bin/show_pathway?ko05100+K06279+K04707</a> |
| ko05220 | Chronic myeloid leukemia                                  | H9IZJ3<br>S4P8C3 | 2 | <a href="http://www.kegg.jp/kegg-bin/show_pathway?ko05220+K06279+K04707">http://www.kegg.jp/kegg-bin/show_pathway?ko05220+K06279+K04707</a> |
| ko05202 | Transcriptional misregulation in cancer                   | H9JR08<br>H9ISH7 | 2 | <a href="http://www.kegg.jp/kegg-bin/show_pathway?ko05202+K12823+K11644">http://www.kegg.jp/kegg-bin/show_pathway?ko05202+K12823+K11644</a> |
| ko03020 | RNA polymerase                                            | H9J1U7<br>G6DL52 | 2 | <a href="http://www.kegg.jp/kegg-bin/show_pathway?ko03020+K03006+K03008">http://www.kegg.jp/kegg-bin/show_pathway?ko03020+K03006+K03008</a> |
| ko04630 | Jak-STAT signaling pathway                                | S4P8C3<br>H9IUC3 | 2 | <a href="http://www.kegg.jp/kegg-bin/show_pathway?ko04630+K04707+K04498">http://www.kegg.jp/kegg-bin/show_pathway?ko04630+K04707+K04498</a> |

|         |                                                  |                  |   |                                                                                                                                             |
|---------|--------------------------------------------------|------------------|---|---------------------------------------------------------------------------------------------------------------------------------------------|
| ko00564 | Glycerophospholipid metabolism                   | H9JQK7<br>H9JEI1 | 2 | <a href="http://www.kegg.jp/kegg-bin/show_pathway?ko00564+K00967+K14676">http://www.kegg.jp/kegg-bin/show_pathway?ko00564+K00967+K14676</a> |
| ko04390 | Hippo signaling pathway                          | H9J2E4<br>G6D5P3 | 2 | <a href="http://www.kegg.jp/kegg-bin/show_pathway?ko04390+K16687+K06630">http://www.kegg.jp/kegg-bin/show_pathway?ko04390+K16687+K06630</a> |
| ko04391 | Hippo signaling pathway - fly                    | H9J2E4<br>G6D5P3 | 2 | <a href="http://www.kegg.jp/kegg-bin/show_pathway?ko04391+K16687+K06630">http://www.kegg.jp/kegg-bin/show_pathway?ko04391+K16687+K06630</a> |
| ko04310 | Wnt signaling pathway                            | G6DK55<br>H9IUC3 | 2 | <a href="http://www.kegg.jp/kegg-bin/show_pathway?ko04310+K04508+K04498">http://www.kegg.jp/kegg-bin/show_pathway?ko04310+K04508+K04498</a> |
| ko04146 | Peroxisome                                       | H9JQH9<br>H9JBL2 | 2 | <a href="http://www.kegg.jp/kegg-bin/show_pathway?ko04146+K11147+K00031">http://www.kegg.jp/kegg-bin/show_pathway?ko04146+K11147+K00031</a> |
| ko03320 | PPAR signaling pathway                           | G6CYN2<br>H9ITJ2 | 2 | <a href="http://www.kegg.jp/kegg-bin/show_pathway?ko03320+K15013+K00864">http://www.kegg.jp/kegg-bin/show_pathway?ko03320+K15013+K00864</a> |
| ko04150 | mTOR signaling pathway                           | H9ISY0<br>S4PTG2 | 2 | <a href="http://www.kegg.jp/kegg-bin/show_pathway?ko04150+K08267+K03258">http://www.kegg.jp/kegg-bin/show_pathway?ko04150+K08267+K03258</a> |
| ko00720 | Carbon fixation pathways in prokaryotes          | H9JFB9<br>H9JBL2 | 2 | <a href="http://www.kegg.jp/kegg-bin/show_pathway?ko00720+K01679+K00031">http://www.kegg.jp/kegg-bin/show_pathway?ko00720+K01679+K00031</a> |
| ko04918 | Thyroid hormone synthesis                        | H9J971<br>H9U396 | 2 | <a href="http://www.kegg.jp/kegg-bin/show_pathway?ko04918+K01540+K09487">http://www.kegg.jp/kegg-bin/show_pathway?ko04918+K01540+K09487</a> |
| ko04360 | Axon guidance                                    | K9J9U2           | 1 | <a href="http://www.kegg.jp/kegg-bin/show_pathway?ko04360+K05765">http://www.kegg.jp/kegg-bin/show_pathway?ko04360+K05765</a>               |
| ko04015 | Rap1 signaling pathway                           | E3UJZ8           | 1 | <a href="http://www.kegg.jp/kegg-bin/show_pathway?ko04015+K02183">http://www.kegg.jp/kegg-bin/show_pathway?ko04015+K02183</a>               |
| ko04070 | Phosphatidylinositol signaling system            | E3UJZ8           | 1 | <a href="http://www.kegg.jp/kegg-bin/show_pathway?ko04070+K02183">http://www.kegg.jp/kegg-bin/show_pathway?ko04070+K02183</a>               |
| ko04270 | Vascular smooth muscle contraction               | E3UJZ8           | 1 | <a href="http://www.kegg.jp/kegg-bin/show_pathway?ko04270+K02183">http://www.kegg.jp/kegg-bin/show_pathway?ko04270+K02183</a>               |
| ko04728 | Dopaminergic synapse                             | E3UJZ8           | 1 | <a href="http://www.kegg.jp/kegg-bin/show_pathway?ko04728+K02183">http://www.kegg.jp/kegg-bin/show_pathway?ko04728+K02183</a>               |
| ko04744 | Phototransduction                                | E3UJZ8           | 1 | <a href="http://www.kegg.jp/kegg-bin/show_pathway?ko04744+K02183">http://www.kegg.jp/kegg-bin/show_pathway?ko04744+K02183</a>               |
| ko04745 | Phototransduction - fly                          | E3UJZ8           | 1 | <a href="http://www.kegg.jp/kegg-bin/show_pathway?ko04745+K02183">http://www.kegg.jp/kegg-bin/show_pathway?ko04745+K02183</a>               |
| ko04750 | Inflammatory mediator regulation of TRP channels | E3UJZ8           | 1 | <a href="http://www.kegg.jp/kegg-bin/show_pathway?ko04750+K02183">http://www.kegg.jp/kegg-bin/show_pathway?ko04750+K02183</a>               |
| ko04912 | GnRH signaling pathway                           | E3UJZ8           | 1 | <a href="http://www.kegg.jp/kegg-bin/show_pathway?ko04912+K02183">http://www.kegg.jp/kegg-bin/show_pathway?ko04912+K02183</a>               |
| ko04921 | Oxytocin signaling pathway                       | E3UJZ8           | 1 | <a href="http://www.kegg.jp/kegg-bin/show_pathway?ko04921+K02183">http://www.kegg.jp/kegg-bin/show_pathway?ko04921+K02183</a>               |

|         |                                           |        |   |                                                                                                                               |
|---------|-------------------------------------------|--------|---|-------------------------------------------------------------------------------------------------------------------------------|
| ko04914 | Progesterone-mediated oocyte maturation   | Q3V6C6 | 1 | <a href="http://www.kegg.jp/kegg-bin/show_pathway?ko04914+K04079">http://www.kegg.jp/kegg-bin/show_pathway?ko04914+K04079</a> |
| ko05160 | Hepatitis C                               | Q8I6Y8 | 1 | <a href="http://www.kegg.jp/kegg-bin/show_pathway?ko05160+K03237">http://www.kegg.jp/kegg-bin/show_pathway?ko05160+K03237</a> |
| ko05162 | Measles                                   | Q8I6Y8 | 1 | <a href="http://www.kegg.jp/kegg-bin/show_pathway?ko05162+K03237">http://www.kegg.jp/kegg-bin/show_pathway?ko05162+K03237</a> |
| ko04115 | p53 signaling pathway                     | S4PCX5 | 1 | <a href="http://www.kegg.jp/kegg-bin/show_pathway?ko04115+K10808">http://www.kegg.jp/kegg-bin/show_pathway?ko04115+K10808</a> |
| ko00350 | Tyrosine metabolism                       | G0T406 | 1 | <a href="http://www.kegg.jp/kegg-bin/show_pathway?ko00350+K00121">http://www.kegg.jp/kegg-bin/show_pathway?ko00350+K00121</a> |
| ko00626 | Naphthalene degradation                   | G0T406 | 1 | <a href="http://www.kegg.jp/kegg-bin/show_pathway?ko00626+K00121">http://www.kegg.jp/kegg-bin/show_pathway?ko00626+K00121</a> |
| ko01220 | Degradation of aromatic compounds         | G0T406 | 1 | <a href="http://www.kegg.jp/kegg-bin/show_pathway?ko01220+K00121">http://www.kegg.jp/kegg-bin/show_pathway?ko01220+K00121</a> |
| ko05146 | Amoebiasis                                | B2X122 | 1 | <a href="http://www.kegg.jp/kegg-bin/show_pathway?ko05146+K13963">http://www.kegg.jp/kegg-bin/show_pathway?ko05146+K13963</a> |
| ko00562 | Inositol phosphate metabolism             | G6CIZ7 | 1 | <a href="http://www.kegg.jp/kegg-bin/show_pathway?ko00562+K01803">http://www.kegg.jp/kegg-bin/show_pathway?ko00562+K01803</a> |
| ko04142 | Lysosome                                  | I4DQ01 | 1 | <a href="http://www.kegg.jp/kegg-bin/show_pathway?ko04142+K12399">http://www.kegg.jp/kegg-bin/show_pathway?ko04142+K12399</a> |
| ko04130 | SNARE interactions in vesicular transport | H9JAP5 | 1 | <a href="http://www.kegg.jp/kegg-bin/show_pathway?ko04130+K04560">http://www.kegg.jp/kegg-bin/show_pathway?ko04130+K04560</a> |
| ko04062 | Chemokine signaling pathway               | H9IZJ3 | 1 | <a href="http://www.kegg.jp/kegg-bin/show_pathway?ko04062+K06279">http://www.kegg.jp/kegg-bin/show_pathway?ko04062+K06279</a> |
| ko04510 | Focal adhesion                            | H9IZJ3 | 1 | <a href="http://www.kegg.jp/kegg-bin/show_pathway?ko04510+K06279">http://www.kegg.jp/kegg-bin/show_pathway?ko04510+K06279</a> |
| ko04650 | Natural killer cell mediated cytotoxicity | H9IZJ3 | 1 | <a href="http://www.kegg.jp/kegg-bin/show_pathway?ko04650+K06279">http://www.kegg.jp/kegg-bin/show_pathway?ko04650+K06279</a> |
| ko04917 | Prolactin signaling pathway               | H9IZJ3 | 1 | <a href="http://www.kegg.jp/kegg-bin/show_pathway?ko04917+K06279">http://www.kegg.jp/kegg-bin/show_pathway?ko04917+K06279</a> |
| ko00512 | Mucin type O-Glycan biosynthesis          | S4PBL3 | 1 | <a href="http://www.kegg.jp/kegg-bin/show_pathway?ko00512+K00710">http://www.kegg.jp/kegg-bin/show_pathway?ko00512+K00710</a> |
| ko04080 | Neuroactive ligand-receptor interaction   | G6DI16 | 1 | <a href="http://www.kegg.jp/kegg-bin/show_pathway?ko04080+K05236">http://www.kegg.jp/kegg-bin/show_pathway?ko04080+K05236</a> |
| ko04660 | T cell receptor signaling pathway         | S4P8C3 | 1 | <a href="http://www.kegg.jp/kegg-bin/show_pathway?ko04660+K04707">http://www.kegg.jp/kegg-bin/show_pathway?ko04660+K04707</a> |
| ko00270 | Cysteine and methionine metabolism        | Q1HQB5 | 1 | <a href="http://www.kegg.jp/kegg-bin/show_pathway?ko00270+K00789">http://www.kegg.jp/kegg-bin/show_pathway?ko00270+K00789</a> |

|         |                                                        |        |   |                                                                                                                               |
|---------|--------------------------------------------------------|--------|---|-------------------------------------------------------------------------------------------------------------------------------|
| ko04140 | Regulation of autophagy                                | J9XNW6 | 1 | <a href="http://www.kegg.jp/kegg-bin/show_pathway?ko04140+K08342">http://www.kegg.jp/kegg-bin/show_pathway?ko04140+K08342</a> |
| ko00563 | Glycosylphosphatidylinositol (GPI)-anchor biosyntheses | G6CQB4 | 1 | <a href="http://www.kegg.jp/kegg-bin/show_pathway?ko00563+K05290">http://www.kegg.jp/kegg-bin/show_pathway?ko00563+K05290</a> |
| ko00440 | Phosphonate and phosphinate metabolism                 | H9JQK7 | 1 | <a href="http://www.kegg.jp/kegg-bin/show_pathway?ko00440+K00967">http://www.kegg.jp/kegg-bin/show_pathway?ko00440+K00967</a> |
| ko04010 | MAPK signaling pathway                                 | G6CV32 | 1 | <a href="http://www.kegg.jp/kegg-bin/show_pathway?ko04010+K04461">http://www.kegg.jp/kegg-bin/show_pathway?ko04010+K04461</a> |
| ko04340 | Hedgehog signaling pathway                             | G6D6P8 | 1 | <a href="http://www.kegg.jp/kegg-bin/show_pathway?ko04340+K08958">http://www.kegg.jp/kegg-bin/show_pathway?ko04340+K08958</a> |
| ko04540 | Gap junction                                           | Q8T9W9 | 1 | <a href="http://www.kegg.jp/kegg-bin/show_pathway?ko04540+K07376">http://www.kegg.jp/kegg-bin/show_pathway?ko04540+K07376</a> |
| ko04611 | Platelet activation                                    | Q8T9W9 | 1 | <a href="http://www.kegg.jp/kegg-bin/show_pathway?ko04611+K07376">http://www.kegg.jp/kegg-bin/show_pathway?ko04611+K07376</a> |
| ko04730 | Long-term depression                                   | Q8T9W9 | 1 | <a href="http://www.kegg.jp/kegg-bin/show_pathway?ko04730+K07376">http://www.kegg.jp/kegg-bin/show_pathway?ko04730+K07376</a> |
| ko03440 | Homologous recombination                               | S4PEX9 | 1 | <a href="http://www.kegg.jp/kegg-bin/show_pathway?ko03440+K02327">http://www.kegg.jp/kegg-bin/show_pathway?ko03440+K02327</a> |
| ko02020 | Two-component system                                   | I4DNC1 | 1 | <a href="http://www.kegg.jp/kegg-bin/show_pathway?ko02020+K00413">http://www.kegg.jp/kegg-bin/show_pathway?ko02020+K00413</a> |
| ko04710 | Circadian rhythm                                       | 077129 | 1 | <a href="http://www.kegg.jp/kegg-bin/show_pathway?ko04710+K02633">http://www.kegg.jp/kegg-bin/show_pathway?ko04710+K02633</a> |
| ko04711 | Circadian rhythm - fly                                 | 077129 | 1 | <a href="http://www.kegg.jp/kegg-bin/show_pathway?ko04711+K02633">http://www.kegg.jp/kegg-bin/show_pathway?ko04711+K02633</a> |
| ko03060 | Protein export                                         | H9JFU5 | 1 | <a href="http://www.kegg.jp/kegg-bin/show_pathway?ko03060+K13431">http://www.kegg.jp/kegg-bin/show_pathway?ko03060+K13431</a> |
| ko00061 | Fatty acid biosyntheses                                | G6CYN2 | 1 | <a href="http://www.kegg.jp/kegg-bin/show_pathway?ko00061+K15013">http://www.kegg.jp/kegg-bin/show_pathway?ko00061+K15013</a> |
| ko04920 | Adipocytokine signaling pathway                        | G6CYN2 | 1 | <a href="http://www.kegg.jp/kegg-bin/show_pathway?ko04920+K15013">http://www.kegg.jp/kegg-bin/show_pathway?ko04920+K15013</a> |
| ko03460 | Fanconi anemia pathway                                 | G6D6E9 | 1 | <a href="http://www.kegg.jp/kegg-bin/show_pathway?ko03460+K02350">http://www.kegg.jp/kegg-bin/show_pathway?ko03460+K02350</a> |
| ko04111 | Cell cycle - yeast                                     | S4PXM6 | 1 | <a href="http://www.kegg.jp/kegg-bin/show_pathway?ko04111+K02542">http://www.kegg.jp/kegg-bin/show_pathway?ko04111+K02542</a> |
| ko04113 | Meiosis - yeast                                        | S4PXM6 | 1 | <a href="http://www.kegg.jp/kegg-bin/show_pathway?ko04113+K02542">http://www.kegg.jp/kegg-bin/show_pathway?ko04113+K02542</a> |
| ko04622 | RIG-I-like receptor signaling pathway                  | S4PT88 | 1 | <a href="http://www.kegg.jp/kegg-bin/show_pathway?ko04622+K09578">http://www.kegg.jp/kegg-bin/show_pathway?ko04622+K09578</a> |

|         |                                                        |        |   |                                                                                                                               |
|---------|--------------------------------------------------------|--------|---|-------------------------------------------------------------------------------------------------------------------------------|
| ko01040 | Biosynthesis of unsaturated fatty acids                | G6CWA4 | 1 | <a href="http://www.kegg.jp/kegg-bin/show_pathway?ko01040+K07515">http://www.kegg.jp/kegg-bin/show_pathway?ko01040+K07515</a> |
| ko04512 | ECM-receptor interaction                               | S4PXE2 | 1 | <a href="http://www.kegg.jp/kegg-bin/show_pathway?ko04512+K06265">http://www.kegg.jp/kegg-bin/show_pathway?ko04512+K06265</a> |
| ko05410 | Hypertrophic cardiomyopathy (HCM)                      | S4PXE2 | 1 | <a href="http://www.kegg.jp/kegg-bin/show_pathway?ko05410+K06265">http://www.kegg.jp/kegg-bin/show_pathway?ko05410+K06265</a> |
| ko05412 | Arrhythmogenic right ventricular cardiomyopathy (ARVC) | S4PXE2 | 1 | <a href="http://www.kegg.jp/kegg-bin/show_pathway?ko05412+K06265">http://www.kegg.jp/kegg-bin/show_pathway?ko05412+K06265</a> |
| ko05414 | Dilated cardiomyopathy                                 | S4PXE2 | 1 | <a href="http://www.kegg.jp/kegg-bin/show_pathway?ko05414+K06265">http://www.kegg.jp/kegg-bin/show_pathway?ko05414+K06265</a> |
| ko05416 | Viral myocarditis                                      | S4PXE2 | 1 | <a href="http://www.kegg.jp/kegg-bin/show_pathway?ko05416+K06265">http://www.kegg.jp/kegg-bin/show_pathway?ko05416+K06265</a> |
| ko00730 | Thiamine metabolism                                    | H9J119 | 1 | <a href="http://www.kegg.jp/kegg-bin/show_pathway?ko00730+K04487">http://www.kegg.jp/kegg-bin/show_pathway?ko00730+K04487</a> |
| ko04122 | Sulfur relay system                                    | H9J119 | 1 | <a href="http://www.kegg.jp/kegg-bin/show_pathway?ko04122+K04487">http://www.kegg.jp/kegg-bin/show_pathway?ko04122+K04487</a> |
| ko00600 | Sphingolipid metabolism                                | S4PD38 | 1 | <a href="http://www.kegg.jp/kegg-bin/show_pathway?ko00600+K00654">http://www.kegg.jp/kegg-bin/show_pathway?ko00600+K00654</a> |
| ko04960 | Aldosterone-regulated sodium reabsorption              | H9J971 | 1 | <a href="http://www.kegg.jp/kegg-bin/show_pathway?ko04960+K01540">http://www.kegg.jp/kegg-bin/show_pathway?ko04960+K01540</a> |
| ko04964 | Proximal tubule bicarbonate reclamation                | H9J971 | 1 | <a href="http://www.kegg.jp/kegg-bin/show_pathway?ko04964+K01540">http://www.kegg.jp/kegg-bin/show_pathway?ko04964+K01540</a> |
| ko04972 | Pancreatic secretion                                   | H9J971 | 1 | <a href="http://www.kegg.jp/kegg-bin/show_pathway?ko04972+K01540">http://www.kegg.jp/kegg-bin/show_pathway?ko04972+K01540</a> |
| ko04973 | Carbohydrate digestion and absorption                  | H9J971 | 1 | <a href="http://www.kegg.jp/kegg-bin/show_pathway?ko04973+K01540">http://www.kegg.jp/kegg-bin/show_pathway?ko04973+K01540</a> |
| ko04974 | Protein digestion and absorption                       | H9J971 | 1 | <a href="http://www.kegg.jp/kegg-bin/show_pathway?ko04974+K01540">http://www.kegg.jp/kegg-bin/show_pathway?ko04974+K01540</a> |
| ko04976 | Bile secretion                                         | H9J971 | 1 | <a href="http://www.kegg.jp/kegg-bin/show_pathway?ko04976+K01540">http://www.kegg.jp/kegg-bin/show_pathway?ko04976+K01540</a> |
| ko04978 | Mineral absorption                                     | H9J971 | 1 | <a href="http://www.kegg.jp/kegg-bin/show_pathway?ko04978+K01540">http://www.kegg.jp/kegg-bin/show_pathway?ko04978+K01540</a> |
| ko04068 | FoxO signaling pathway                                 | H9IUC3 | 1 | <a href="http://www.kegg.jp/kegg-bin/show_pathway?ko04068+K04498">http://www.kegg.jp/kegg-bin/show_pathway?ko04068+K04498</a> |
| ko04330 | Notch signaling pathway                                | H9IUC3 | 1 | <a href="http://www.kegg.jp/kegg-bin/show_pathway?ko04330+K04498">http://www.kegg.jp/kegg-bin/show_pathway?ko04330+K04498</a> |



|         |                                 |        |   |                                                                                                                               |
|---------|---------------------------------|--------|---|-------------------------------------------------------------------------------------------------------------------------------|
| ko04350 | TGF-beta signaling pathway      | H9IUC3 | 1 | <a href="http://www.kegg.jp/kegg-bin/show_pathway?ko04350+K04498">http://www.kegg.jp/kegg-bin/show_pathway?ko04350+K04498</a> |
| ko04520 | Adherens junction               | H9IUC3 | 1 | <a href="http://www.kegg.jp/kegg-bin/show_pathway?ko04520+K04498">http://www.kegg.jp/kegg-bin/show_pathway?ko04520+K04498</a> |
| ko00140 | Steroid hormone biosynthesis    | G9LPR1 | 1 | <a href="http://www.kegg.jp/kegg-bin/show_pathway?ko00140+K00699">http://www.kegg.jp/kegg-bin/show_pathway?ko00140+K00699</a> |
| ko00983 | Drug metabolism - other enzymes | G9LPR1 | 1 | <a href="http://www.kegg.jp/kegg-bin/show_pathway?ko00983+K00699">http://www.kegg.jp/kegg-bin/show_pathway?ko00983+K00699</a> |
